# Supplementary material for: CENPU Promotes Growth and Metastasis in Nasopharyngeal Carcinoma by Inhibiting DUSP6
Source: Research Square preprint supplement (doi:10.21203/rs.3.rs-1120474/v1), 2021-12-22
Supplement: Supplementary file 1 [file f3b6685c6b8e75efc81649b4.xlsx]

## Sheet: Different Gene
Entrez	Gene Symbol	Gene Title	NC-1	NC-2	NC-3	KD-1	KD-2	KD-3	Fold Change	logFC	absolute FC	Regulation	P-value	FDR
4907	NT5E	5'-nucleotidase, ecto (CD73)	9.3553	9.18603	9.08692	6.03664	6.25657	5.9141	-8.81716	-3.14031	8.81716	down	4.86659e-13	9.0305e-10
9635	CLCA2	chloride channel accessory 2	7.15664	6.82714	6.96772	3.79717	4.25672	4.04079	-7.73968	-2.95227	7.73968	down	1.93874e-11	8.09322e-09
3490	IGFBP7	insulin like growth factor binding protein 7	10.3	10.2612	10.3539	7.35705	7.27779	7.53966	-7.53473	-2.91356	7.53473	down	2.75818e-14	3.6077e-10
115207	KCTD12	potassium channel tetramerization domain containing 12	7.03086	7.2427	7.2646	4.07476	4.15415	4.59037	-7.4969	-2.90629	7.4969	down	3.77692e-11	1.27652e-08
8091	HMGA2	high mobility group AT-hook 2	10.7943	10.6573	10.6273	7.94265	8.01848	8.01488	-6.50242	-2.70098	6.50242	down	6.75803e-15	2.1555e-10
374	AREG	amphiregulin	7.78209	7.77211	7.64416	5.26907	5.28152	5.48872	-5.22833	-2.38635	5.22833	down	2.67562e-12	2.28242e-09
201799	TMEM154	transmembrane protein 154	6.56508	6.49621	6.52459	4.03968	4.55138	4.20343	-4.80254	-2.2638	4.80254	down	2.63745e-10	4.53919e-08
25840	METTL7A	methyltransferase like 7A	7.47376	7.40308	7.40497	9.7463	9.6079	9.70955	4.79206	2.26065	4.79206	up	7.59939e-14	3.67251e-10
3853	KRT6A	keratin 6A, type II	7.95913	8.22047	7.92634	5.91081	5.73136	5.76576	-4.70003	-2.23267	4.70003	down	1.44763e-11	6.60521e-09
286887	KRT6C	keratin 6C, type II	7.95913	8.22047	7.92634	5.91081	5.73136	5.76576	-4.70003	-2.23267	4.70003	down	1.44763e-11	6.60521e-09
3854	KRT6B	keratin 6B, type II	7.95913	8.22047	7.92634	5.91081	5.73136	5.76576	-4.70003	-2.23267	4.70003	down	1.44763e-11	6.60521e-09
93273	LEMD1	LEM domain containing 1	7.29345	7.30361	7.37966	5.18856	5.11442	5.06433	-4.60479	-2.20314	4.60479	down	1.88512e-12	1.93533e-09
23682	RAB38	RAB38, member RAS oncogene family	7.16439	7.21471	7.21054	5.19635	4.82371	5.14946	-4.40774	-2.14004	4.40774	down	7.02679e-11	1.94177e-08
9801	MRPL19	mitochondrial ribosomal protein L19	7.94965	7.94937	8.02016	5.90071	5.8849	5.73648	-4.38435	-2.13236	4.38435	down	1.92349e-12	1.93533e-09
858	CAV2	caveolin 2	9.5101	9.65431	9.58582	7.50065	7.44165	7.41215	-4.38302	-2.13193	4.38302	down	1.7419e-13	4.88229e-10
5049	PAFAH1B2	platelet activating factor acetylhydrolase 1b catalytic subunit 2	8.52785	8.67584	8.64741	6.57004	6.44686	6.46258	-4.35863	-2.12387	4.35863	down	1.04323e-12	1.36555e-09
54332	GDAP1	ganglioside induced differentiation associated protein 1	4.48916	4.3878	4.66992	6.50198	6.76999	6.59441	4.30645	2.1065	4.30645	up	1.00169e-10	2.42632e-08
3852	KRT5	keratin 5, type II	7.24414	7.48091	7.1673	5.24696	5.16458	5.20819	-4.26006	-2.09087	4.26006	down	3.04878e-11	1.09756e-08
51560	RAB6B	RAB6B, member RAS oncogene family	4.6763	4.95638	4.68916	6.86714	6.80657	6.87398	4.21427	2.07528	4.21427	up	4.03782e-11	1.3156e-08
647087	C7orf73	chromosome 7 open reading frame 73	6.66881	6.59483	6.47268	4.34957	4.58921	4.59638	-4.1903	-2.06705	4.1903	down	6.59117e-11	1.87873e-08
8754	ADAM9	ADAM metallopeptidase domain 9	9.2625	9.1944	9.26317	7.15417	7.27249	7.0929	-4.18967	-2.06684	4.18967	down	5.91388e-13	1.00896e-09
83729	INHBE	inhibin beta E	6.17649	6.21911	6.14052	4.04725	3.9053	4.40863	-4.16499	-2.05831	4.16499	down	8.47722e-10	1.00729e-07
444	ASPH	aspartate beta-hydroxylase	8.4045	8.43312	7.95572	6.23861	6.36418	6.04421	-4.13756	-2.04878	4.13756	down	1.31327e-09	1.37391e-07
6781	STC1	stanniocalcin 1	8.5718	8.46905	8.62161	6.50616	6.50618	6.63852	-4.01074	-2.00387	4.01074	down	2.44973e-12	2.18472e-09
388403	YPEL2	yippee like 2	4.492	4.09265	4.19682	6.11205	6.30843	6.31616	3.95878	1.98506	3.95878	up	6.53474e-10	8.49411e-08
29940	DSE	dermatan sulfate epimerase	8.3511	8.15617	8.19487	6.20137	6.35404	6.26266	-3.89428	-1.96136	3.89428	down	7.88272e-12	4.68663e-09
2152	F3	coagulation factor III (thromboplastin, tissue factor)	7.66848	7.35317	7.00692	5.1867	5.29718	5.67389	-3.88236	-1.95693	3.88236	down	3.67611e-08	1.50348e-06
10447	FAM3C	family with sequence similarity 3 member C	7.66885	7.60606	7.53107	5.58755	5.65779	5.71431	-3.86047	-1.94878	3.86047	down	6.66366e-12	4.15051e-09
255967	PAN3	PAN3 poly(A) specific ribonuclease subunit	5.18169	5.59186	5.68357	7.26792	7.33654	7.68135	3.84477	1.9429	3.84477	up	7.71607e-09	4.82131e-07
665	BNIP3L	BCL2/adenovirus E1B 19kDa interacting protein 3-like	8.26994	8.09975	8.17208	6.18484	6.37625	6.17102	-3.8279	-1.93655	3.8279	down	1.48059e-11	6.66176e-09
27347	STK39	serine/threonine kinase 39	8.06303	7.81851	7.89747	6.09754	5.91033	5.9781	-3.81323	-1.93101	3.81323	down	2.93813e-11	1.08766e-08
55973	BCAP29	B-cell receptor-associated protein 29	6.63693	6.60868	6.52347	4.44745	4.8801	4.65226	-3.80991	-1.92976	3.80991	down	5.31554e-10	7.34444e-08
3673	ITGA2	integrin, alpha 2 (CD49B, alpha 2 subunit of VLA-2 receptor)	7.28443	6.8946	7.09593	4.9621	5.35807	5.18411	-3.79358	-1.92356	3.79358	down	1.73021e-09	1.67225e-07
347902	AMIGO2	adhesion molecule with Ig-like domain 2	6.51951	6.44032	6.37906	4.59427	4.72871	4.26151	-3.77934	-1.91813	3.77934	down	1.20214e-09	1.28534e-07
8835	SOCS2	suppressor of cytokine signaling 2	7.37448	7.30043	7.2679	5.46662	5.3465	5.43021	-3.73168	-1.89983	3.73168	down	9.60035e-12	5.18229e-09
9689	BZW1	basic leucine zipper and W2 domains 1	8.37924	8.35262	8.2223	6.32511	6.76416	6.22858	-3.67761	-1.87877	3.67761	down	2.19321e-09	1.99216e-07
1964	EIF1AX	eukaryotic translation initiation factor 1A, X-linked	8.97375	8.95438	8.95953	6.95236	7.20499	7.09715	-3.67494	-1.87772	3.67494	down	5.68403e-12	3.78036e-09
59345	GNB4	guanine nucleotide binding protein (G protein), beta polypeptide 4	9.82358	9.60398	9.68103	7.81001	7.79382	7.8779	-3.66959	-1.87562	3.66959	down	2.0968e-12	2.00679e-09
896	CCND3	cyclin D3	9.72057	9.57699	9.66877	7.97018	7.5845	7.80441	-3.653	-1.86908	3.653	down	6.60469e-11	1.87873e-08
9588	PRDX6	peroxiredoxin 6	8.97714	9.03005	8.8657	7.05036	7.19024	7.05956	-3.62398	-1.85758	3.62398	down	4.17828e-12	3.04382e-09
91408	BTF3L4	basic transcription factor 3-like 4	6.4119	6.53283	6.63814	8.43167	8.32775	8.38322	3.61315	1.85326	3.61315	up	1.0891e-11	5.51136e-09
1854	DUT	deoxyuridine triphosphatase	8.67936	8.67614	8.7631	6.88782	6.80263	6.87614	-3.60668	-1.85067	3.60668	down	1.46811e-12	1.69437e-09
6414	SEPP1	selenoprotein P, plasma, 1	5.44186	5.51174	5.51492	7.23006	7.46948	7.30647	3.5946	1.84583	3.5946	up	3.80613e-11	1.27652e-08
10019	SH2B3	SH2B adaptor protein 3	9.61896	9.62388	9.51543	7.78608	7.79881	7.64462	-3.58735	-1.84292	3.58735	down	1.62655e-12	1.82359e-09
169200	TMEM64	transmembrane protein 64	6.18129	6.29838	6.46035	4.44508	4.32094	4.64581	-3.58688	-1.84273	3.58688	down	8.22213e-10	9.86655e-08
642587	MIR205HG	MIR205 host gene	10.6951	10.6868	10.6603	8.92604	8.76033	8.84952	-3.5687	-1.8354	3.5687	down	2.10162e-13	5.15423e-10
2196	FAT2	FAT atypical cadherin 2	7.67118	7.71275	7.58302	5.766	5.81008	5.93964	-3.52366	-1.81708	3.52366	down	2.04596e-11	8.4107e-09
83787	ARMC10	armadillo repeat containing 10	7.83259	7.81487	7.94802	6.17613	6.21366	5.77376	-3.50799	-1.81064	3.50799	down	1.17514e-09	1.26683e-07
54014	BRWD1	bromodomain and WD repeat domain containing 1	6.91449	6.79053	6.87052	5.11649	5.07205	4.96061	-3.5035	-1.8088	3.5035	down	4.05678e-11	1.3156e-08
9653	HS2ST1	heparan sulfate 2-O-sulfotransferase 1	6.19241	6.0057	6.16671	4.28265	4.59578	4.08958	-3.47964	-1.79894	3.47964	down	5.084e-09	3.61406e-07
7039	TGFA	transforming growth factor alpha	8.10914	8.03408	8.00105	6.30404	6.26048	6.24168	-3.43273	-1.77936	3.43273	down	5.05576e-12	3.42049e-09
3552	IL1A	interleukin 1 alpha	9.38522	9.27967	9.36106	7.47622	7.70466	7.54729	-3.40092	-1.76593	3.40092	down	8.15523e-12	4.70605e-09
256302	NATD1	N-acetyltransferase domain containing 1	6.15505	6.14955	6.16819	7.93643	7.85491	7.97805	3.4	1.76553	3.4	up	6.43148e-12	4.0705e-09
151313	FAHD2B	fumarylacetoacetate hydrolase domain containing 2B	6.39363	6.41003	6.2951	4.75908	4.54802	4.54802	-3.35865	-1.74788	3.35865	down	2.01574e-10	3.73102e-08
84918	LRP11	LDL receptor related protein 11	10.4318	10.4457	10.4674	8.71149	8.74752	8.66647	-3.33991	-1.73981	3.33991	down	1.15886e-13	3.79458e-10
23089	PEG10	paternally expressed 10	7.72475	7.67714	7.56707	6.07187	5.92354	5.77612	-3.32298	-1.73248	3.32298	down	1.69321e-10	3.42794e-08
81831	NETO2	neuropilin and tolloid like 2	8.44433	8.43253	8.31559	6.71608	6.7098	6.59963	-3.29965	-1.72231	3.29965	down	1.00578e-11	5.33334e-09
79148	MMP28	matrix metallopeptidase 28	7.58434	7.62645	7.55344	6.077	5.64244	5.88188	-3.29658	-1.72097	3.29658	down	8.97605e-10	1.039e-07
29968	PSAT1	phosphoserine aminotransferase 1	8.54612	8.73374	8.54916	6.88212	7.06135	6.74672	-3.27829	-1.71294	3.27829	down	1.88306e-10	3.56963e-08
116496	FAM129A	family with sequence similarity 129 member A	7.51011	7.62473	7.69646	5.81181	6.10327	5.78214	-3.27469	-1.71136	3.27469	down	5.22938e-10	7.27662e-08
116064	LRRC58	leucine rich repeat containing 58	8.51312	8.40169	8.46732	6.66109	6.96689	6.7046	-3.21136	-1.68318	3.21136	down	1.46746e-10	3.11261e-08
3038	HAS3	hyaluronan synthase 3	8.10294	8.27857	8.14175	6.4816	6.48175	6.51912	-3.20486	-1.68026	3.20486	down	1.61854e-11	6.97928e-09
7805	LAPTM5	lysosomal protein transmembrane 5	8.8927	8.95593	8.94973	7.30772	7.23966	7.23373	-3.18748	-1.67242	3.18748	down	2.2178e-12	2.07118e-09
9674	KIAA0040	KIAA0040	5.09518	5.18593	4.72975	3.24732	3.63544	3.12541	-3.17678	-1.66756	3.17678	down	1.05591e-07	3.28058e-06
84959	UBASH3B	ubiquitin associated and SH3 domain containing B	5.39543	5.47333	5.22224	3.63323	3.54938	3.9091	-3.17428	-1.66643	3.17428	down	5.18209e-09	3.67126e-07
5465	PPARA	peroxisome proliferator-activated receptor alpha	6.96733	7.04357	7.03816	5.13262	5.49101	5.44436	-3.16095	-1.66036	3.16095	down	1.05717e-09	1.17851e-07
345757	FAM174A	family with sequence similarity 174 member A	6.74578	6.66184	6.60357	5.22675	5.01219	4.7952	-3.15801	-1.65902	3.15801	down	2.81387e-09	2.34429e-07
54149	C21orf91	chromosome 21 open reading frame 91	7.36038	7.03705	7.18533	5.35782	5.43	5.81947	-3.15686	-1.65849	3.15686	down	1.31819e-08	7.15062e-07
2673	GFPT1	glutamine--fructose-6-phosphate transaminase 1	7.57985	7.27297	7.44775	5.67158	5.76074	5.92718	-3.13187	-1.64702	3.13187	down	9.08243e-10	1.04392e-07
23576	DDAH1	dimethylarginine dimethylaminohydrolase 1	9.49439	9.37839	9.4672	7.78451	7.85095	7.76465	-3.131	-1.64662	3.131	down	2.26964e-12	2.07118e-09
2926	GRSF1	G-rich RNA sequence binding factor 1	7.48224	7.46357	7.46734	5.7054	5.74817	6.04354	-3.11381	-1.63868	3.11381	down	5.70083e-10	7.77949e-08
79098	C1orf116	chromosome 1 open reading frame 116	7.03544	7.00459	6.98024	5.31006	5.38183	5.41984	-3.10842	-1.63618	3.10842	down	4.68693e-11	1.46145e-08
113201	CASC4	cancer susceptibility candidate 4	6.63131	6.6067	6.57919	4.89007	5.09281	4.92971	-3.1056	-1.63487	3.1056	down	1.84699e-10	3.53541e-08
55824	PAG1	phosphoprotein membrane anchor with glycosphingolipid microdomains 1	5.66677	5.49416	5.61851	3.99351	3.93729	3.95333	-3.09893	-1.63177	3.09893	down	3.28586e-10	5.2843e-08
7905	REEP5	receptor accessory protein 5	8.39092	8.24234	8.21458	6.51255	6.70769	6.74254	-3.0916	-1.62835	3.0916	down	1.31171e-10	2.94123e-08
1305	COL13A1	collagen, type XIII, alpha 1	7.56174	7.71437	7.6279	5.9955	5.94517	6.09848	-3.0772	-1.62162	3.0772	down	6.5253e-11	1.87873e-08
51762	RAB8B	RAB8B, member RAS oncogene family	6.06421	6.12696	6.23701	4.40751	4.57903	4.58063	-3.07447	-1.62034	3.07447	down	4.94918e-10	7.06203e-08
5054	SERPINE1	serpin peptidase inhibitor, clade E (nexin, plasminogen activator inhibitor type 1), member 1	8.06587	8.08994	8.01446	6.4984	6.43094	6.43094	-3.03844	-1.60333	3.03844	down	1.24207e-11	5.94376e-09
285521	COX18	COX18 cytochrome c oxidase assembly factor	7.93201	8.07173	7.91632	6.42144	6.37882	6.33635	-3.01986	-1.59448	3.01986	down	3.66499e-11	1.25133e-08
140609	NEK7	NIMA-related kinase 7	7.94428	7.74237	7.88341	6.14634	6.39658	6.25047	-3.01514	-1.59222	3.01514	down	2.98654e-10	4.90343e-08
57460	PPM1H	protein phosphatase, Mg2+/Mn2+ dependent 1H	6.27497	6.29888	6.01901	7.87414	7.68422	7.7927	3.0023	1.58607	3.0023	up	5.94895e-10	8.04955e-08
6509	SLC1A4	solute carrier family 1 (glutamate/neutral amino acid transporter), member 4	5.97244	5.8691	5.84609	4.35751	4.41989	4.15638	-2.99928	-1.58462	2.99928	down	1.20102e-09	1.28534e-07
55105	GPATCH2	G-patch domain containing 2	4.32073	4.04205	4.12133	5.61614	5.8424	5.77246	2.99446	1.5823	2.99446	up	2.7584e-09	2.31281e-07
1810	DR1	down-regulator of transcription 1	7.99501	7.95691	7.70512	6.2456	6.31103	6.36697	-2.98517	-1.57781	2.98517	down	3.86306e-10	5.89831e-08
53833	IL20RB	interleukin 20 receptor beta subunit	7.07781	7.12723	7.07647	5.47467	5.49809	5.58898	-2.97576	-1.57326	2.97576	down	6.84741e-11	1.90562e-08
83640	FAM103A1	family with sequence similarity 103 member A1	7.35005	7.1507	7.20797	5.65584	5.68788	5.65236	-2.97086	-1.57088	2.97086	down	1.26517e-10	2.86968e-08
50848	F11R	F11 receptor	4.33893	4.47787	4.59107	5.96807	5.91643	6.22228	2.96145	1.5663	2.96145	up	4.47614e-09	3.25266e-07
2967	GTF2H3	general transcription factor IIH subunit 3	6.15821	5.82617	5.98277	7.61928	7.61175	7.41639	2.94872	1.56009	2.94872	up	1.537e-09	1.53856e-07
794	CALB2	calbindin 2	7.24446	7.21134	7.22473	5.56607	5.66473	5.78445	-2.93853	-1.55509	2.93853	down	1.64842e-10	3.4098e-08
64710	NUCKS1	nuclear casein kinase and cyclin-dependent kinase substrate 1	9.09001	9.13652	8.94424	7.47269	7.58678	7.44959	-2.9361	-1.5539	2.9361	down	3.55257e-11	1.24467e-08
10468	FST	follistatin	5.92059	5.97717	5.93528	4.2492	4.46875	4.46382	-2.92903	-1.55042	2.92903	down	8.56549e-10	1.00934e-07
28234	SLCO1B3	solute carrier organic anion transporter family member 1B3	7.35439	7.34996	7.21562	5.82862	5.88161	5.55869	-2.92888	-1.55035	2.92888	down	1.38941e-09	1.43098e-07
641700	ECSCR	endothelial cell surface expressed chemotaxis and apoptosis regulator	4.83321	4.60697	4.68166	3.06204	3.32176	3.10186	-2.91884	-1.54539	2.91884	down	5.32542e-09	3.73827e-07
94234	FOXQ1	forkhead box Q1	8.4845	8.34174	8.49448	6.9342	6.73733	7.01674	-2.91632	-1.54415	2.91632	down	2.93793e-10	4.86431e-08
11009	IL24	interleukin 24	7.06173	6.89848	7.03793	5.61615	5.45876	5.2922	-2.91537	-1.54368	2.91537	down	1.55231e-09	1.54601e-07
6367	CCL22	chemokine (C-C motif) ligand 22	8.0867	7.96568	7.96402	6.59792	6.34892	6.44932	-2.90811	-1.54008	2.90811	down	2.06801e-10	3.78725e-08
6158	RPL28	ribosomal protein L28	5.3983	5.35229	5.39038	6.98004	6.86915	6.88518	2.89013	1.53113	2.89013	up	1.10369e-10	2.57789e-08
7052	TGM2	transglutaminase 2	6.24382	6.89149	6.70061	5.1034	5.23418	4.91751	-2.88175	-1.52694	2.88175	down	2.18366e-07	5.56769e-06
3572	IL6ST	interleukin 6 signal transducer	5.74955	5.77347	5.87472	4.09044	4.57795	4.18657	-2.85652	-1.51426	2.85652	down	3.06316e-08	1.32981e-06
84440	RAB11FIP4	RAB11 family interacting protein 4 (class II)	5.22212	4.74856	5.03022	6.52006	6.37761	6.62221	2.84086	1.50633	2.84086	up	2.46184e-08	1.13918e-06
3892	KRT86	keratin 86, type II	8.11444	8.01343	8.08004	6.36478	6.57152	6.79399	-2.81384	-1.49254	2.81384	down	3.11582e-09	2.53661e-07
9341	VAMP3	vesicle associated membrane protein 3	9.14889	9.02356	9.01812	7.55793	7.56633	7.58972	-2.81317	-1.4922	2.81317	down	1.07418e-11	5.51136e-09
64065	PERP	PERP, TP53 apoptosis effector	6.39935	6.38102	6.33629	4.80093	4.93923	4.90773	-2.80809	-1.48959	2.80809	down	3.46621e-10	5.48444e-08
56648	EIF5A2	eukaryotic translation initiation factor 5A2	6.89234	6.71213	6.80908	5.29495	5.32559	5.34681	-2.79349	-1.48207	2.79349	down	3.00165e-10	4.9077e-08
1452	CSNK1A1	casein kinase 1, alpha 1	8.27339	8.21515	8.16011	6.66257	6.77688	6.76407	-2.7928	-1.48171	2.7928	down	4.41978e-11	1.41002e-08
4085	MAD2L1	MAD2 mitotic arrest deficient-like 1 (yeast)	8.20398	8.30927	7.93628	6.68072	6.77141	6.5553	-2.79084	-1.4807	2.79084	down	3.24692e-09	2.58727e-07
80143	SIKE1	suppressor of IKBKE 1	7.7097	7.45198	7.48541	5.97342	6.23218	6.0079	-2.78536	-1.47786	2.78536	down	2.47746e-09	2.15556e-07
8803	SUCLA2	succinate-CoA ligase, ADP-forming, beta subunit	7.34425	7.25867	7.1108	5.68365	6.05105	5.54755	-2.784	-1.47716	2.784	down	3.42133e-08	1.42822e-06
54932	EXD3	exonuclease 3'-5' domain containing 3	9.05519	8.84591	8.97572	7.41492	7.37553	7.66348	-2.77848	-1.4743	2.77848	down	6.99652e-10	8.93458e-08
28957	MRPS28	mitochondrial ribosomal protein S28	6.98778	7.09142	7.01261	5.45803	5.55869	5.65728	-2.77522	-1.4726	2.77522	down	3.87944e-10	5.90036e-08
7739	ZNF185	zinc finger protein 185 (LIM domain)	8.19862	8.16081	8.1278	6.65496	6.67056	6.74666	-2.77345	-1.47168	2.77345	down	2.92978e-11	1.08766e-08
65124	SOWAHC	sosondowah ankyrin repeat domain family member C	8.97587	9.05508	9.03948	7.50662	7.62181	7.53891	-2.7658	-1.4677	2.7658	down	1.23654e-11	5.94376e-09
55754	TMEM30A	transmembrane protein 30A	6.50811	6.35541	6.23261	4.97007	4.83391	4.89549	-2.76169	-1.46555	2.76169	down	2.00723e-09	1.87087e-07
51028	VPS36	vacuolar protein sorting 36 homolog (S. cerevisiae)	3.91679	3.79019	3.82515	5.19978	5.57203	5.13623	2.74849	1.45864	2.74849	up	3.28345e-08	1.38989e-06
148867	SLC30A7	solute carrier family 30 (zinc transporter), member 7	7.41657	7.3214	7.3416	5.90591	5.9232	5.88098	-2.7444	-1.45649	2.7444	down	8.89907e-11	2.2242e-08
1915	EEF1A1	eukaryotic translation elongation factor 1 alpha 1	5.58871	5.48904	5.51498	3.84188	4.12501	4.25975	-2.74226	-1.45536	2.74226	down	1.72426e-08	8.68549e-07
6785	ELOVL4	ELOVL fatty acid elongase 4	5.62644	5.2842	5.65528	4.01532	3.98128	4.21908	-2.73223	-1.45008	2.73223	down	3.13771e-08	1.35004e-06
80854	SETD7	SET domain containing (lysine methyltransferase) 7	8.07691	8.1789	8.07779	6.51941	6.81606	6.66346	-2.72242	-1.44489	2.72242	down	6.16053e-10	8.16687e-08
2634	GBP2	guanylate binding protein 2, interferon-inducible	4.02585	3.87089	4.27597	5.25517	5.74252	5.48557	2.70729	1.43685	2.70729	up	1.9093e-07	5.08527e-06
4300	MLLT3	myeloid/lymphoid or mixed-lineage leukemia; translocated to, 3	4.33638	4.26825	4.36927	5.71589	5.86993	5.68747	2.70032	1.43313	2.70032	up	1.60814e-09	1.58551e-07
8697	CDC23	cell division cycle 23	8.65685	8.64429	8.69677	7.18831	7.34964	7.16133	-2.69985	-1.43288	2.69985	down	6.76208e-11	1.89532e-08
6674	SPAG1	sperm associated antigen 1	6.33611	6.368	6.44396	4.96236	5.07736	4.81536	-2.69633	-1.431	2.69633	down	1.94472e-09	1.82633e-07
22822	PHLDA1	pleckstrin homology-like domain, family A, member 1	8.11296	8.13002	8.02231	6.68458	6.63936	6.66453	-2.68627	-1.42561	2.68627	down	4.69274e-11	1.46145e-08
574040	SNORA6	small nucleolar RNA, H/ACA box 6	3.79893	4.43783	3.83316	5.37504	5.47718	5.48007	2.67732	1.42079	2.67732	up	5.76048e-07	1.19599e-05
3921	RPSA	ribosomal protein SA	3.79893	4.43783	3.83316	5.37504	5.47718	5.48007	2.67732	1.42079	2.67732	up	5.76048e-07	1.19599e-05
7498	XDH	xanthine dehydrogenase	6.50551	6.42579	6.44052	4.9674	5.18195	4.96429	-2.67473	-1.41939	2.67473	down	1.54696e-09	1.5446e-07
389362	PSMG4	proteasome (prosome, macropain) assembly chaperone 4	8.35044	8.28837	8.25959	6.8818	6.91118	6.84858	-2.6739	-1.41895	2.6739	down	3.23901e-11	1.15544e-08
394	ARHGAP5	Rho GTPase activating protein 5	6.32039	6.0746	6.24096	4.6802	4.829	4.87244	-2.67234	-1.4181	2.67234	down	3.80041e-09	2.89008e-07
55041	PLEKHB2	pleckstrin homology domain containing B2	7.9844	7.87793	7.84912	9.26271	9.44131	9.25114	2.6658	1.41457	2.6658	up	8.76084e-11	2.21371e-08
6102	RP2	retinitis pigmentosa 2 (X-linked recessive)	8.03407	7.91767	7.99265	6.59056	6.55624	6.55986	-2.66212	-1.41258	2.66212	down	5.96503e-11	1.78678e-08
6348	CCL3	chemokine (C-C motif) ligand 3	7.51432	7.3424	7.62755	6.02005	5.93625	6.29377	-2.65995	-1.4114	2.65995	down	1.24476e-08	6.85907e-07
80209	PROSER1	proline and serine rich 1	8.12567	8.07897	8.07681	6.61504	6.86473	6.57639	-2.65448	-1.40843	2.65448	down	8.0822e-10	9.84668e-08
8714	ABCC3	ATP binding cassette subfamily C member 3	8.76222	8.7893	8.64193	7.24046	7.3823	7.35286	-2.64991	-1.40594	2.64991	down	8.48111e-11	2.17515e-08
58527	ABRACL	ABRA C-terminal like	9.57894	9.49045	9.53699	8.10114	8.12787	8.16754	-2.64502	-1.40328	2.64502	down	5.96482e-12	3.83704e-09
9645	MICAL2	microtubule associated monooxygenase, calponin and LIM domain containing 2	9.08636	9.22104	9.1706	7.6752	7.84165	7.76685	-2.63554	-1.3981	2.63554	down	5.45211e-11	1.6457e-08
6645	SNTB2	syntrophin, beta 2 (dystrophin-associated protein A1, 59kDa, basic component 2)	6.43239	6.46979	6.34423	4.91044	5.08031	5.064	-2.63394	-1.39722	2.63394	down	1.27067e-09	1.34397e-07
6657	SOX2	SRY-box 2	5.17932	5.67602	5.13904	6.49481	6.8783	6.81269	2.63379	1.39714	2.63379	up	4.65512e-07	1.00921e-05
5965	RECQL	RecQ helicase-like	8.01011	7.7861	7.97715	6.35089	6.64951	6.59514	-2.62553	-1.39261	2.62553	down	3.7809e-09	2.88643e-07
64089	SNX16	sorting nexin 16	4.81025	4.44547	4.86294	5.99058	6.0628	6.24023	2.62379	1.39165	2.62379	up	5.84092e-08	2.14204e-06
22936	ELL2	elongation factor, RNA polymerase II, 2	7.98226	7.81234	7.91528	6.43408	6.60805	6.49739	-2.621	-1.39012	2.621	down	3.65008e-10	5.66312e-08
152559	PAQR3	progestin and adipoQ receptor family member III	6.77435	6.76166	6.8388	5.33518	5.51005	5.36207	-2.61928	-1.38917	2.61928	down	7.31563e-10	9.17141e-08
79600	TCTN1	tectonic family member 1	6.96972	7.02958	7.03343	5.64771	5.61351	5.61173	-2.61461	-1.38659	2.61461	down	2.00554e-10	3.73102e-08
93974	ATPIF1	ATPase inhibitory factor 1	5.23808	5.63648	5.19895	6.79284	6.61775	6.80982	2.60684	1.3823	2.60684	up	5.0297e-08	1.8989e-06
6574	SLC20A1	solute carrier family 20 (phosphate transporter), member 1	10.9224	10.9815	10.9099	9.55727	9.54778	9.56474	-2.60509	-1.38133	2.60509	down	5.06297e-13	9.0305e-10
201475	RAB12	RAB12, member RAS oncogene family	5.0557	4.88151	5.0042	3.57004	3.53649	3.71062	-2.59324	-1.37475	2.59324	down	5.76214e-09	3.95243e-07
54811	ZNF562	zinc finger protein 562	3.71621	3.62979	3.74013	5.00338	5.03849	5.16468	2.59094	1.37347	2.59094	up	3.49527e-09	2.70521e-07
1460	CSNK2B	casein kinase 2, beta polypeptide	5.48265	5.64814	5.67934	7.04039	6.84677	7.03745	2.58738	1.37149	2.58738	up	2.4138e-09	2.12371e-07
6138	RPL15	ribosomal protein L15	8.38378	8.70723	8.38273	7.02804	7.29958	7.03875	-2.58314	-1.36912	2.58314	down	1.22552e-08	6.78268e-07
51534	VTA1	vesicle (multivesicular body) trafficking 1	7.56908	7.68853	7.6755	6.24089	6.21843	6.36901	-2.58159	-1.36826	2.58159	down	3.44364e-10	5.47079e-08
114882	OSBPL8	oxysterol binding protein like 8	8.41218	8.26541	8.35631	6.8914	7.03473	7.00653	-2.57948	-1.36708	2.57948	down	1.64125e-10	3.4098e-08
56204	FAM214A	family with sequence similarity 214 member A	5.58755	5.65009	5.55392	6.87783	7.07143	6.94263	2.57894	1.36678	2.57894	up	8.49678e-10	1.00729e-07
200765	TIGD1	tigger transposable element derived 1	4.68374	4.48975	4.71571	5.81588	6.10534	6.06775	2.5786	1.36659	2.5786	up	1.6541e-08	8.3923e-07
56475	RPRM	reprimo, TP53 dependent G2 arrest mediator candidate	4.86631	4.8334	4.9912	6.20722	6.23745	6.34005	2.57506	1.3646	2.57506	up	1.69386e-09	1.64523e-07
4893	NRAS	neuroblastoma RAS viral (v-ras) oncogene homolog	9.57093	9.71949	9.79645	8.23186	8.38701	8.37424	-2.57503	-1.36459	2.57503	down	1.68629e-10	3.42794e-08
7504	XK	X-linked Kx blood group	4.99909	4.75626	5.00248	3.5739	3.41935	3.68178	-2.56851	-1.36093	2.56851	down	2.52647e-08	1.15816e-06
1514	CTSL	cathepsin L	8.33318	8.63094	8.44176	6.97232	7.35377	6.99729	-2.56833	-1.36083	2.56833	down	2.3719e-08	1.1067e-06
387914	SHISA2	shisa family member 2	7.69456	7.60722	7.63719	6.21458	6.2712	6.37337	-2.56675	-1.35994	2.56675	down	2.67966e-10	4.57174e-08
93134	ZNF561	zinc finger protein 561	4.51699	4.51984	4.51984	5.80045	6.03212	5.8025	2.5659	1.35947	2.5659	up	4.07033e-09	3.05311e-07
6337	SCNN1A	sodium channel, non voltage gated 1 alpha subunit	10.0541	9.98254	10.0414	8.73728	8.60097	8.66497	-2.56375	-1.35825	2.56375	down	8.93978e-12	4.9408e-09
5928	RBBP4	retinoblastoma binding protein 4	9.70037	9.54846	9.5199	8.19222	8.25118	8.26121	-2.55745	-1.35471	2.55745	down	4.1569e-11	1.33702e-08
1842	ECM2	extracellular matrix protein 2, female organ and adipocyte specific	6.04543	5.84242	6.22085	4.70362	4.52856	4.81245	-2.55742	-1.35469	2.55742	down	4.50875e-08	1.74632e-06
23321	TRIM2	tripartite motif containing 2	7.47276	7.34066	7.42179	6.09383	6.27516	5.81075	-2.55234	-1.35182	2.55234	down	2.56469e-08	1.16965e-06
140707	BRI3BP	BRI3 binding protein	7.05925	7.31107	7.41335	5.84829	5.81591	6.06538	-2.55153	-1.35136	2.55153	down	1.78531e-08	8.94705e-07
102659353	THRIL	TNF and HNRNPL related immunoregulatory long non-coding RNA	7.05925	7.31107	7.41335	5.84829	5.81591	6.06538	-2.55153	-1.35136	2.55153	down	1.78531e-08	8.94705e-07
7057	THBS1	thrombospondin 1	7.22592	7.04949	7.10848	5.76123	5.70883	5.86131	-2.55061	-1.35084	2.55061	down	9.9822e-10	1.12558e-07
56241	SUSD2	sushi domain containing 2	8.91327	8.92901	8.91878	7.69017	7.5176	7.50325	-2.54914	-1.35001	2.54914	down	9.24995e-11	2.28282e-08
81688	C6orf62	chromosome 6 open reading frame 62	9.755	9.73428	9.72503	8.38506	8.41309	8.37796	-2.54218	-1.34607	2.54218	down	3.47631e-12	2.67472e-09
23243	ANKRD28	ankyrin repeat domain 28	6.85856	6.74745	6.67957	5.3895	5.50861	5.35405	-2.53937	-1.34447	2.53937	down	1.62503e-09	1.59677e-07
92092	ZC3HAV1L	zinc finger CCCH-type, antiviral 1-like	6.98874	6.80363	6.90583	5.5123	5.59117	5.56418	-2.53769	-1.34352	2.53769	down	8.9273e-10	1.03641e-07
9349	RPL23	ribosomal protein L23	4.54093	4.8523	4.85689	6.10784	6.04845	6.11961	2.5349	1.34193	2.5349	up	1.34047e-08	7.24518e-07
619505	SNORA21	small nucleolar RNA, H/ACA box 21	4.54093	4.8523	4.85689	6.10784	6.04845	6.11961	2.5349	1.34193	2.5349	up	1.34047e-08	7.24518e-07
9129	PRPF3	pre-mRNA processing factor 3	7.76352	7.6732	7.63871	9.01069	9.07762	9.00156	2.52826	1.33815	2.52826	up	3.66726e-11	1.25133e-08
9638	FEZ1	fasciculation and elongation protein zeta 1	9.03809	9.10261	9.07361	7.75212	7.68662	7.76558	-2.52567	-1.33666	2.52567	down	1.86783e-11	7.88104e-09
79269	DCAF10	DDB1 and CUL4 associated factor 10	6.49233	6.37415	6.49485	4.99281	5.21281	5.15789	-2.51857	-1.33261	2.51857	down	3.18233e-09	2.57335e-07
3691	ITGB4	integrin beta 4	9.69198	9.7603	9.7662	8.47172	8.32787	8.43115	-2.51271	-1.32925	2.51271	down	2.08058e-11	8.4107e-09
26273	FBXO3	F-box protein 3	3.66126	3.97573	3.80692	5.03361	5.14166	5.25062	2.50937	1.32733	2.50937	up	2.88151e-08	1.27475e-06
54838	WBP1L	WW domain binding protein 1-like	7.30637	7.52803	7.55366	8.78928	8.78697	8.78223	2.50268	1.32347	2.50268	up	3.95656e-10	5.99441e-08
3426	CFI	complement factor I	3.80896	3.87632	3.89181	5.06461	5.29623	5.18525	2.50186	1.323	2.50186	up	7.15698e-09	4.5814e-07
221035	REEP3	receptor accessory protein 3	5.94215	5.70838	5.70838	4.47901	4.35011	4.56123	-2.5016	-1.32285	2.5016	down	1.38271e-08	7.34591e-07
81628	TSC22D4	TSC22 domain family member 4	3.86358	4.25596	3.89596	5.26134	5.27859	5.44186	2.50029	1.3221	2.50029	up	8.34215e-08	2.78119e-06
128866	CHMP4B	charged multivesicular body protein 4B	10.0349	10.0005	9.96855	8.71508	8.61349	8.70999	-2.49976	-1.32179	2.49976	down	8.0103e-12	4.69141e-09
7525	YES1	YES proto-oncogene 1, Src family tyrosine kinase	7.21883	7.13685	7.236	5.8108	6.12378	5.69571	-2.49746	-1.32046	2.49746	down	2.4142e-08	1.12116e-06
2643	GCH1	GTP cyclohydrolase 1	8.97357	8.83595	8.83777	7.52873	7.61447	7.5441	-2.49666	-1.32	2.49666	down	8.0071e-11	2.09466e-08
414062	CCL3L3	chemokine (C-C motif) ligand 3-like 3	7.83394	7.93684	7.5957	6.62341	6.46836	6.31561	-2.49614	-1.3197	2.49614	down	2.00226e-08	9.65215e-07
6349	CCL3L1	chemokine (C-C motif) ligand 3-like 1	7.83394	7.93684	7.5957	6.62341	6.46836	6.31561	-2.49614	-1.3197	2.49614	down	2.00226e-08	9.65215e-07
55177	RMDN3	regulator of microtubule dynamics 3	7.98613	7.9866	7.84742	6.58947	6.64519	6.62914	-2.49456	-1.31878	2.49456	down	2.19528e-10	3.89786e-08
11116	FGFR1OP	FGFR1 oncogene partner	5.88368	5.87305	5.77172	7.03807	7.2989	7.14337	2.49199	1.3173	2.49199	up	2.52464e-09	2.17252e-07
5955	RCN2	reticulocalbin 2	7.85991	8.29971	8.13533	6.67543	6.85085	6.81704	-2.49184	-1.31721	2.49184	down	2.18556e-08	1.03953e-06
11060	WWP2	WW domain containing E3 ubiquitin protein ligase 2	5.48411	5.66909	5.4057	6.79357	6.89718	6.81896	2.49137	1.31694	2.49137	up	3.44578e-09	2.67218e-07
3553	IL1B	interleukin 1 beta	7.54337	7.42776	7.49823	6.20053	6.11	6.21084	-2.48974	-1.316	2.48974	down	3.5432e-10	5.58373e-08
138162	C9orf116	chromosome 9 open reading frame 116	6.57014	6.65351	6.54995	8.06249	7.76661	7.89057	2.48864	1.31536	2.48864	up	1.94547e-09	1.82633e-07
2012	EMP1	epithelial membrane protein 1	4.74009	4.91465	5.0249	3.4836	3.53649	3.71819	-2.48593	-1.31379	2.48593	down	3.41224e-08	1.42746e-06
5349	FXYD3	FXYD domain containing ion transport regulator 3	8.02379	7.95657	8.04731	6.4322	6.828	6.82971	-2.48386	-1.31259	2.48386	down	1.92125e-08	9.3536e-07
145957	NRG4	neuregulin 4	4.6067	5.1156	5.31745	6.11801	6.41961	6.43782	2.48268	1.3119	2.48268	up	2.52024e-06	3.70112e-05
84056	KATNAL1	katanin p60 subunit A-like 1	4.23283	4.11994	4.26077	5.37892	5.52776	5.63188	2.47656	1.30834	2.47656	up	1.06525e-08	6.09337e-07
397	ARHGDIB	Rho GDP dissociation inhibitor (GDI) beta	6.30278	6.19935	6.28788	7.62967	7.4727	7.60623	2.47289	1.3062	2.47289	up	5.70972e-10	7.77949e-08
65989	DLK2	delta-like 2 homolog (Drosophila)	8.54103	8.50274	8.58275	7.27042	7.09055	7.36036	-2.46524	-1.30173	2.46524	down	7.56211e-10	9.3608e-08
10855	HPSE	heparanase	5.51665	5.74955	5.69607	4.56687	4.41989	4.07099	-2.46486	-1.30151	2.46486	down	2.32703e-07	5.84587e-06
5361	PLXNA1	plexin A1	9.64487	9.72821	9.70009	8.46203	8.36544	8.34128	-2.4648	-1.30147	2.4648	down	2.06864e-11	8.4107e-09
3918	LAMC2	laminin subunit gamma 2	7.22467	7.2115	7.13677	5.81755	6.02972	5.82388	-2.46331	-1.3006	2.46331	down	1.86343e-09	1.77545e-07
139886	SPIN4	spindlin family member 4	8.28559	8.36691	8.38284	6.9021	7.0987	7.13309	-2.46311	-1.30048	2.46311	down	7.02526e-10	8.93458e-08
57552	NCEH1	neutral cholesterol ester hydrolase 1	7.55511	7.32467	7.48201	5.97069	6.22627	6.26513	-2.46212	-1.2999	2.46212	down	1.05596e-08	6.05789e-07
27436	EML4	echinoderm microtubule associated protein like 4	5.01176	5.04703	5.20642	6.14273	6.61294	6.40681	2.46074	1.29909	2.46074	up	9.68931e-08	3.09112e-06
23484	LEPROTL1	leptin receptor overlapping transcript-like 1	8.48234	8.50832	8.39932	7.1108	7.28644	7.09761	-2.45952	-1.29838	2.45952	down	3.85712e-10	5.89831e-08
27074	LAMP3	lysosomal-associated membrane protein 3	6.63131	6.66663	6.63615	5.30422	5.39691	5.34381	-2.45612	-1.29638	2.45612	down	7.26327e-10	9.13496e-08
50999	TMED5	transmembrane p24 trafficking protein 5	9.77598	9.63792	9.67296	8.31651	8.48276	8.41047	-2.44931	-1.29237	2.44931	down	7.8334e-11	2.07691e-08
8771	TNFRSF6B	tumor necrosis factor receptor superfamily member 6b	7.63324	7.28543	7.41818	6.21282	6.13711	6.12082	-2.44308	-1.2887	2.44308	down	7.21958e-09	4.58439e-07
100533107	RTEL1-TNFRSF6B	RTEL1-TNFRSF6B readthrough (NMD candidate)	7.63324	7.28543	7.41818	6.21282	6.13711	6.12082	-2.44308	-1.2887	2.44308	down	7.21958e-09	4.58439e-07
3021	H3F3B	H3 histone, family 3B (H3.3B)	10.8052	10.863	10.7856	9.49045	9.51442	9.58555	-2.44157	-1.28781	2.44157	down	3.11737e-12	2.54845e-09
57089	ENTPD7	ectonucleoside triphosphate diphosphohydrolase 7	5.31631	5.09932	5.25316	3.82801	3.89184	4.08616	-2.4412	-1.28759	2.4412	down	2.67821e-08	1.21215e-06
440145	MZT1	mitotic spindle organizing protein 1	7.50201	7.3197	7.40815	8.71642	8.67099	8.70257	2.4397	1.28671	2.4397	up	1.44186e-10	3.09172e-08
8774	NAPG	N-ethylmaleimide-sensitive factor attachment protein, gamma	5.89848	5.90548	5.82578	4.79319	4.52068	4.45669	-2.43918	-1.28639	2.43918	down	2.34933e-08	1.10141e-06
161742	SPRED1	sprouty-related, EVH1 domain containing 1	6.52228	6.40429	6.50136	5.23118	5.18258	5.15636	-2.4384	-1.28594	2.4384	down	1.34322e-09	1.39071e-07
81929	SEH1L	SEH1 like nucleoporin	7.55685	7.6257	7.56574	6.18864	6.42489	6.27834	-2.43762	-1.28547	2.43762	down	1.25113e-09	1.32687e-07
26577	PCOLCE2	procollagen C-endopeptidase enhancer 2	6.584	6.74551	6.62819	5.34239	5.36226	5.40039	-2.4355	-1.28422	2.4355	down	1.46185e-09	1.47843e-07
4664	NAB1	NGFI-A binding protein 1	8.68545	8.38181	8.51807	7.15592	7.40486	7.1748	-2.43387	-1.28325	2.43387	down	7.50058e-09	4.7395e-07
105369247	LOC105369247	nicotinate-nucleotide pyrophosphorylase [carboxylating]-like	7.41793	7.29318	7.52764	8.77633	8.58376	8.72303	2.43084	1.28146	2.43084	up	1.13725e-09	1.2406e-07
23475	QPRT	quinolinate phosphoribosyltransferase	7.41793	7.29318	7.52764	8.77633	8.58376	8.72303	2.43084	1.28146	2.43084	up	1.13725e-09	1.2406e-07
5910	RAP1GDS1	RAP1, GTP-GDP dissociation stimulator 1	6.27609	6.28661	6.13503	4.89745	5.10053	4.86261	-2.42679	-1.27905	2.42679	down	9.53792e-09	5.64507e-07
7779	SLC30A1	solute carrier family 30 (zinc transporter), member 1	9.79154	9.61468	9.70066	8.37737	8.40187	8.49165	-2.42614	-1.27866	2.42614	down	7.73575e-11	2.07691e-08
92400	RBM18	RNA binding motif protein 18	8.18223	8.2175	8.24846	9.4872	9.53558	9.45952	2.42509	1.27804	2.42509	up	1.51095e-11	6.66176e-09
6373	CXCL11	chemokine (C-X-C motif) ligand 11	5.54486	5.3563	5.42154	4.09423	4.30127	4.09423	-2.42445	-1.27766	2.42445	down	1.62324e-08	8.2722e-07
26272	FBXO4	F-box protein 4	6.33331	6.38885	6.50947	5.21895	5.33057	4.86671	-2.41463	-1.2718	2.41463	down	1.22281e-07	3.66284e-06
195827	AAED1	AhpC/TSA antioxidant enzyme domain containing 1	8.53414	8.71428	8.672	7.3207	7.34371	7.44198	-2.41386	-1.27134	2.41386	down	3.32884e-10	5.33158e-08
51129	ANGPTL4	angiopoietin like 4	7.02939	6.97811	7.02845	5.8108	5.64439	5.76708	-2.41367	-1.27123	2.41367	down	1.14373e-09	1.2406e-07
3861	KRT14	keratin 14, type I	7.77482	7.8759	8.00451	6.76408	6.42292	6.65654	-2.41256	-1.27056	2.41256	down	1.37987e-08	7.34591e-07
5412	UBL3	ubiquitin like 3	7.24744	7.14312	7.19724	8.42504	8.50636	8.46379	2.41016	1.26913	2.41016	up	1.04219e-10	2.47852e-08
2247	FGF2	fibroblast growth factor 2 (basic)	5.95808	5.88583	5.89512	4.56773	4.61481	4.76346	-2.40218	-1.26434	2.40218	down	5.30895e-09	3.73339e-07
64114	TMBIM1	transmembrane BAX inhibitor motif containing 1	9.70615	9.80089	9.72827	8.49226	8.45382	8.50111	-2.39945	-1.26271	2.39945	down	1.34587e-11	6.21318e-09
831	CAST	calpastatin	8.51864	8.39391	8.28524	7.08357	7.3226	7.00784	-2.39705	-1.26126	2.39705	down	8.52933e-09	5.20514e-07
6352	CCL5	chemokine (C-C motif) ligand 5	10.1306	10.4081	10.2553	8.97321	9.03998	9.00015	-2.39526	-1.26018	2.39526	down	2.51363e-10	4.42308e-08
2531	KDSR	3-ketodihydrosphingosine reductase	6.88657	6.97763	6.91533	5.59686	5.71718	5.68513	-2.39516	-1.26012	2.39516	down	1.06429e-09	1.18126e-07
8038	ADAM12	ADAM metallopeptidase domain 12	6.48443	6.6303	6.42733	5.17376	5.45883	5.13919	-2.38958	-1.25676	2.38958	down	3.32904e-08	1.40455e-06
134553	C5orf24	chromosome 5 open reading frame 24	9.8615	9.79221	9.88259	8.53829	8.54412	8.68565	-2.38846	-1.25608	2.38846	down	5.15493e-11	1.56806e-08
114908	TMEM123	transmembrane protein 123	9.45712	9.52448	9.47477	8.16296	8.32228	8.2031	-2.38834	-1.25601	2.38834	down	6.27793e-11	1.86626e-08
10608	MXD4	MAX dimerization protein 4	6.97771	7.20493	7.03116	8.44045	8.19631	8.34455	2.38806	1.25584	2.38806	up	3.41908e-09	2.66729e-07
159090	FAM122B	family with sequence similarity 122B	8.06516	8.003	7.95222	6.72259	6.75018	6.78163	-2.38721	-1.25533	2.38721	down	2.08343e-10	3.78725e-08
3077	HFE	hemochromatosis	8.0893	8.04095	7.98567	6.81905	6.64447	6.8924	-2.38392	-1.25333	2.38392	down	1.51173e-09	1.52103e-07
90624	LYRM7	LYR motif containing 7	5.13811	5.04471	4.92605	3.64577	3.97788	3.72724	-2.3828	-1.25266	2.3828	down	7.30084e-08	2.51744e-06
28962	OSTM1	osteopetrosis associated transmembrane protein 1	6.47927	6.45342	6.55278	5.16906	5.17881	5.37966	-2.38278	-1.25265	2.38278	down	5.3923e-09	3.77846e-07
5873	RAB27A	RAB27A, member RAS oncogene family	6.54406	6.59178	6.74096	5.44569	5.31082	5.37101	-2.37802	-1.24976	2.37802	down	4.19496e-09	3.09418e-07
26258	BLOC1S6	biogenesis of lysosomal organelles complex-1, subunit 6, pallidin	4.17332	4.18778	4.79794	5.3739	5.85754	5.66993	2.3742	1.24744	2.3742	up	7.5134e-06	8.61308e-05
1001	CDH3	cadherin 3, type 1, P-cadherin (placental)	8.67777	8.521	8.52995	7.43385	7.23645	7.31725	-2.37357	-1.24706	2.37357	down	8.15538e-10	9.84668e-08
55681	SCYL2	SCY1-like, kinase-like 2	7.22379	6.94625	7.02809	5.7543	5.84557	5.86131	-2.37125	-1.24565	2.37125	down	6.33709e-09	4.20046e-07
1021	CDK6	cyclin-dependent kinase 6	7.98593	8.12753	8.01834	6.64342	6.89326	6.8706	-2.36445	-1.24151	2.36445	down	3.06445e-09	2.50202e-07
723788	MIG7	mig-7	9.29507	9.20398	9.19584	7.94944	8.01595	8.00728	-2.3632	-1.24074	2.3632	down	4.55601e-11	1.44176e-08
5912	RAP2B	RAP2B, member of RAS oncogene family	6.14182	6.25991	6.09689	4.86853	5.05332	4.85556	-2.36265	-1.2404	2.36265	down	9.86702e-09	5.77884e-07
100133093	FAM25G	family with sequence similarity 25 member G	5.71319	6.22	6.13678	4.63715	4.82735	4.88671	-2.36131	-1.23959	2.36131	down	5.21202e-07	1.10253e-05
100132929	FAM25BP	protein FAM25	5.71319	6.22	6.13678	4.63715	4.82735	4.88671	-2.36131	-1.23959	2.36131	down	5.21202e-07	1.10253e-05
644054	FAM25C	family with sequence similarity 25 member C	5.71319	6.22	6.13678	4.63715	4.82735	4.88671	-2.36131	-1.23959	2.36131	down	5.21202e-07	1.10253e-05
8614	STC2	stanniocalcin 2	8.51063	8.48517	8.54831	7.30859	7.26546	7.25204	-2.36091	-1.23934	2.36091	down	7.80607e-11	2.07691e-08
8560	DEGS1	delta(4)-desaturase, sphingolipid 1	10.5145	10.4997	10.5172	9.25022	9.26686	9.30367	-2.35686	-1.23687	2.35686	down	2.5352e-12	2.21069e-09
90019	SYT8	synaptotagmin VIII	7.61205	7.61387	7.815	6.48187	6.43805	6.42033	-2.35146	-1.23356	2.35146	down	1.56445e-09	1.55023e-07
654320	SNORA8	small nucleolar RNA, H/ACA box 8	5.99822	5.96413	5.88529	7.05519	7.25046	7.24032	2.35019	1.23278	2.35019	up	2.88825e-09	2.39103e-07
203427	SLC25A43	solute carrier family 25, member 43	7.69993	7.86967	7.80313	6.53638	6.56682	6.57967	-2.34559	-1.22995	2.34559	down	5.99575e-10	8.08499e-08
11030	RBPMS	RNA binding protein with multiple splicing	5.8789	5.81067	5.96161	7.11207	7.00349	7.22442	2.34502	1.2296	2.34502	up	4.08091e-09	3.05311e-07
5591	PRKDC	protein kinase, DNA-activated, catalytic polypeptide	7.71631	7.64362	7.42276	6.33963	6.52043	6.23728	-2.34315	-1.22845	2.34315	down	2.42628e-08	1.12405e-06
64434	NOM1	nucleolar protein with MIF4G domain 1	6.65713	6.54538	6.43921	5.10761	5.45824	5.39191	-2.3424	-1.22799	2.3424	down	5.61241e-08	2.07179e-06
126731	CCSAP	centriole, cilia and spindle-associated protein	7.16098	7.23825	7.20186	6.05738	5.90218	5.96228	-2.33985	-1.22642	2.33985	down	1.23604e-09	1.31443e-07
1848	DUSP6	dual specificity phosphatase 6	9.83382	9.78214	9.85381	8.63903	8.58776	8.56658	-2.33831	-1.22547	2.33831	down	1.50918e-11	6.66176e-09
137492	VPS37A	vacuolar protein sorting 37 homolog A (S. cerevisiae)	5.64771	5.51729	5.45744	4.42091	4.39637	4.13536	-2.33475	-1.22327	2.33475	down	5.05247e-08	1.90268e-06
23161	SNX13	sorting nexin 13	5.77823	5.64771	5.65012	6.83248	7.05989	6.85269	2.33432	1.223	2.33432	up	7.20681e-09	4.58439e-07
64798	DEPTOR	DEP domain containing MTOR-interacting protein	3.95953	4.15867	3.68891	5.24258	5.20984	5.02008	2.33237	1.2218	2.33237	up	3.57894e-07	8.25619e-06
54165	DCUN1D1	DCN1, defective in cullin neddylation 1, domain containing 1	5.74114	6.02023	5.91432	7.01855	7.14239	7.17626	2.33028	1.2205	2.33028	up	9.86354e-09	5.77884e-07
9837	GINS1	GINS complex subunit 1 (Psf1 homolog)	5.52262	5.965	5.74936	4.49847	4.63054	4.45239	-2.32709	-1.21853	2.32709	down	1.67622e-07	4.65168e-06
90736	FAM104B	family with sequence similarity 104 member B	5.69521	5.68307	5.68307	4.69166	4.42712	4.2926	-2.32408	-1.21666	2.32408	down	7.41471e-08	2.54998e-06
9650	MTFR1	mitochondrial fission regulator 1	9.61019	9.66296	9.61699	8.37053	8.35791	8.5133	-2.32323	-1.21613	2.32323	down	7.75726e-11	2.07691e-08
51144	HSD17B12	hydroxysteroid (17-beta) dehydrogenase 12	6.30405	6.49473	6.06014	4.91565	5.10337	5.19231	-2.3228	-1.21586	2.3228	down	2.14699e-07	5.5028e-06
54491	FAM105A	family with sequence similarity 105 member A	4.3731	4.07995	4.28144	5.42615	5.58495	5.36081	2.31735	1.21247	2.31735	up	6.25879e-08	2.26146e-06
58489	ABHD17C	abhydrolase domain containing 17C	8.35375	8.55073	8.348	7.22769	7.19803	7.19426	-2.31471	-1.21083	2.31471	down	7.7885e-10	9.55065e-08
54545	MTMR12	myotubularin related protein 12	4.56072	4.49488	4.70105	5.71289	5.70204	5.97271	2.31391	1.21033	2.31391	up	4.9286e-08	1.87039e-06
26225	ARL5A	ADP ribosylation factor like GTPase 5A	8.7677	8.75723	8.78025	7.50859	7.52573	7.64203	-2.31275	-1.20961	2.31275	down	1.39095e-10	3.01552e-08
79884	MAP9	microtubule associated protein 9	5.27922	5.10327	5.1157	3.72805	4.12527	4.02068	-2.31027	-1.20806	2.31027	down	1.78188e-07	4.86237e-06
57380	MRS2	MRS2, magnesium transporter	7.3631	7.2925	7.16445	5.99107	6.0278	6.18588	-2.30553	-1.2051	2.30553	down	5.78158e-09	3.95243e-07
5862	RAB2A	RAB2A, member RAS oncogene family	7.95594	7.765	7.74793	6.49306	6.65687	6.7046	-2.30502	-1.20478	2.30502	down	5.65436e-09	3.91317e-07
440	ASNS	asparagine synthetase (glutamine-hydrolyzing)	8.26543	8.22762	8.18307	6.88821	7.18234	6.99271	-2.30423	-1.20429	2.30423	down	3.40171e-09	2.65903e-07
23076	RRP1B	ribosomal RNA processing 1B	9.86803	9.86264	9.81853	8.643	8.66226	8.63167	-2.30392	-1.20409	2.30392	down	1.05307e-11	5.50968e-09
5265	SERPINA1	serpin peptidase inhibitor, clade A (alpha-1 antiproteinase, antitrypsin), member 1	4.30632	4.41777	4.70511	3.40863	3.61854	2.78993	-2.30383	-1.20403	2.30383	down	2.63561e-05	0.000230543
54431	DNAJC10	DnaJ heat shock protein family (Hsp40) member C10	5.91763	5.67171	5.53548	4.28905	4.50449	4.72166	-2.30251	-1.20321	2.30251	down	6.18633e-07	1.2632e-05
9687	GREB1	growth regulation by estrogen in breast cancer 1	4.39393	4.67968	4.59589	6.08677	5.8108	5.37976	2.30156	1.20261	2.30156	up	4.44004e-06	5.71986e-05
5537	PPP6C	protein phosphatase 6, catalytic subunit	7.3501	7.3684	7.28422	5.97342	6.1741	6.2498	-2.30026	-1.2018	2.30026	down	6.4963e-09	4.25567e-07
81555	YIPF5	Yip1 domain family member 5	7.68975	7.58593	7.80436	6.44114	6.55774	6.47775	-2.29921	-1.20114	2.29921	down	2.27121e-09	2.05351e-07
53339	BTBD1	BTB (POZ) domain containing 1	9.92019	9.79935	9.85125	8.53355	8.72972	8.70625	-2.29807	-1.20042	2.29807	down	2.54916e-10	4.44574e-08
10927	SPIN1	spindlin 1	6.59568	7.52387	7.55533	8.21105	8.62239	8.44143	2.29739	1.2	2.29739	up	8.06128e-05	0.000559569
9581	PREPL	prolyl endopeptidase-like	7.76684	7.55683	7.74487	6.46166	6.59841	6.41166	-2.2957	-1.19894	2.2957	down	4.99698e-09	3.57161e-07
1075	CTSC	cathepsin C	8.87096	8.96762	8.86545	7.65911	7.7398	7.70985	-2.29489	-1.19842	2.29489	down	1.18099e-10	2.71007e-08
3643	INSR	insulin receptor	6.28922	6.7026	6.5609	7.69735	7.77359	7.67628	2.29448	1.19817	2.29448	up	3.56789e-08	1.47373e-06
55331	ACER3	alkaline ceramidase 3	7.68498	7.72303	7.70598	6.36652	6.60931	6.54838	-2.29198	-1.19659	2.29198	down	2.56805e-09	2.19065e-07
4734	NEDD4	neural precursor cell expressed, developmentally down-regulated 4, E3 ubiquitin protein ligase	5.36894	5.28457	5.33472	6.36866	6.77658	6.4313	2.2912	1.1961	2.2912	up	9.20229e-08	2.98182e-06
50515	CHST11	carbohydrate (chondroitin 4) sulfotransferase 11	8.33536	8.04285	8.1956	7.00544	6.97308	7.009	-2.29013	-1.19543	2.29013	down	3.0134e-09	2.47376e-07
65056	GPBP1	GC-rich promoter binding protein 1	4.65372	5.21468	5.3047	6.00951	6.41247	6.33629	2.28954	1.19506	2.28954	up	7.0757e-06	8.20723e-05
57403	RAB22A	RAB22A, member RAS oncogene family	7.47279	7.387	7.39775	6.22498	6.2647	6.18276	-2.2895	-1.19503	2.2895	down	7.52342e-10	9.34727e-08
23274	CLEC16A	C-type lectin domain family 16, member A	5.30946	5.3934	5.2784	6.68812	6.42129	6.45661	2.28932	1.19492	2.28932	up	1.6772e-08	8.48109e-07
134265	AFAP1L1	actin filament associated protein 1 like 1	4.35007	4.59114	4.47974	3.32	3.15028	3.3668	-2.28885	-1.19462	2.28885	down	6.86903e-08	2.41103e-06
22931	RAB18	RAB18, member RAS oncogene family	5.76135	5.3182	5.4098	4.24622	4.21732	4.44363	-2.28796	-1.19406	2.28796	down	4.0336e-07	9.029e-06
51809	GALNT7	polypeptide N-acetylgalactosaminyltransferase 7	8.38162	8.35611	8.42225	7.01538	7.30142	7.28173	-2.27702	-1.18715	2.27702	down	4.6099e-09	3.33135e-07
81928	CABLES2	Cdk5 and Abl enzyme substrate 2	7.41218	7.31684	7.41335	8.55574	8.54069	8.60659	2.2766	1.18688	2.2766	up	1.80581e-10	3.50792e-08
84968	PNMA6A	paraneoplastic Ma antigen family member 6A	6.04324	5.73824	5.70776	7.15873	6.88402	7.00467	2.27531	1.18606	2.27531	up	9.1642e-08	2.97439e-06
91543	RSAD2	radical S-adenosyl methionine domain containing 2	6.30033	6.25354	6.27985	4.7478	5.29178	5.24792	-2.26903	-1.18207	2.26903	down	8.03993e-07	1.53447e-05
10605	PAIP1	poly(A) binding protein interacting protein 1	7.47776	7.52736	7.46487	8.70559	8.71593	8.593	2.26814	1.18151	2.26814	up	2.16146e-10	3.85525e-08
2935	GSPT1	G1 to S phase transition 1	7.81506	7.65391	7.7051	6.52997	6.58342	6.52305	-2.26453	-1.17921	2.26453	down	1.02664e-09	1.15101e-07
7555	CNBP	CCHC-type zinc finger, nucleic acid binding protein	7.99706	7.94487	8.06557	6.65709	6.84528	6.97117	-2.26261	-1.17799	2.26261	down	8.27005e-09	5.08647e-07
3162	HMOX1	heme oxygenase 1	5.47214	6.15686	5.64619	6.82238	6.77571	7.2078	2.2609	1.1769	2.2609	up	9.34256e-06	0.000102403
28966	SNX24	sorting nexin 24	6.52925	6.31067	6.31352	7.62059	7.55434	7.50447	2.25843	1.17532	2.25843	up	4.85169e-09	3.48044e-07
29880	ALG5	ALG5, dolichyl-phosphate beta-glucosyltransferase	8.08552	7.95789	8.04832	9.14006	9.26084	9.21653	2.25829	1.17523	2.25829	up	1.78466e-10	3.49298e-08
9779	TBC1D5	TBC1 domain family member 5	8.46318	8.41697	8.44717	7.25978	7.22814	7.31657	-2.2568	-1.17428	2.2568	down	1.75343e-10	3.49035e-08
2744	GLS	glutaminase	8.14488	7.94497	8.05323	6.79109	6.9815	6.84865	-2.25628	-1.17395	2.25628	down	3.25057e-09	2.58727e-07
9616	RNF7	ring finger protein 7	9.81684	9.90113	9.76899	8.69563	8.64248	8.62962	-2.25492	-1.17308	2.25492	down	5.05011e-11	1.54817e-08
51030	TVP23B	trans-golgi network vesicle protein 23 homolog B (S. cerevisiae)	7.31884	7.31299	7.27662	6.04805	6.30013	6.04368	-2.25355	-1.1722	2.25355	down	8.48994e-09	5.19727e-07
201158	TVP23C	trans-golgi network vesicle protein 23 homolog C (S. cerevisiae)	7.31884	7.31299	7.27662	6.04805	6.30013	6.04368	-2.25355	-1.1722	2.25355	down	8.48994e-09	5.19727e-07
51012	PRELID3B	PRELI domain containing 3B	7.55697	7.53113	7.484	6.34537	6.51611	6.19999	-2.25044	-1.17021	2.25044	down	1.06399e-08	6.09337e-07
200058	FLJ23867	uncharacterized protein FLJ23867	6.7115	6.59944	6.6548	5.65041	5.32675	5.48986	-2.24426	-1.16624	2.24426	down	2.83313e-08	1.26045e-06
5768	QSOX1	quiescin sulfhydryl oxidase 1	6.7115	6.59944	6.6548	5.65041	5.32675	5.48986	-2.24426	-1.16624	2.24426	down	2.83313e-08	1.26045e-06
10766	TOB2	transducer of ERBB2, 2	6.42705	7.15849	6.84072	7.93163	7.82975	8.16225	2.24356	1.16579	2.24356	up	5.14793e-06	6.42305e-05
50808	AK3	adenylate kinase 3	8.60719	8.66885	8.60213	7.33212	7.59844	7.45094	-2.2432	-1.16556	2.2432	down	1.96959e-09	1.84455e-07
338442	HCAR2	hydroxycarboxylic acid receptor 2	7.77237	7.58369	7.53114	6.45545	6.53606	6.39997	-2.24271	-1.16524	2.24271	down	5.91437e-09	4.01852e-07
8843	HCAR3	hydroxycarboxylic acid receptor 3	7.77237	7.58369	7.53114	6.45545	6.53606	6.39997	-2.24271	-1.16524	2.24271	down	5.91437e-09	4.01852e-07
23363	OBSL1	obscurin-like 1	7.70852	7.6992	7.63967	6.38517	6.68712	6.47966	-2.24256	-1.16515	2.24256	down	8.76662e-09	5.30482e-07
400	ARL1	ADP ribosylation factor like GTPase 1	7.12023	7.33336	7.17401	5.98802	6.12705	6.02292	-2.23954	-1.1632	2.23954	down	6.45296e-09	4.24144e-07
57222	ERGIC1	endoplasmic reticulum-golgi intermediate compartment 1	5.40341	6.20864	6.04039	7.15224	6.94798	7.03916	2.23816	1.16231	2.23816	up	1.22241e-05	0.000127134
7326	UBE2G1	ubiquitin conjugating enzyme E2G 1	9.09882	9.037	9.20173	7.96824	7.87427	8.00918	-2.2376	-1.16195	2.2376	down	4.30103e-10	6.34483e-08
51768	TM7SF3	transmembrane 7 superfamily member 3	6.32035	6.31833	6.34498	5.10599	5.25301	5.14166	-2.23612	-1.161	2.23612	down	5.03606e-09	3.593e-07
163050	ZNF564	zinc finger protein 564	4.41989	4.36588	4.96072	5.73021	5.74955	5.74955	2.23603	1.16094	2.23603	up	2.04294e-06	3.15983e-05
253827	MSRB3	methionine sulfoxide reductase B3	5.45187	5.3397	5.39384	4.20617	4.24845	4.24845	-2.23578	-1.16078	2.23578	down	9.50845e-09	5.64335e-07
387263	C6orf120	chromosome 6 open reading frame 120	8.25524	8.33394	8.39499	7.1095	7.15024	7.24232	-2.23566	-1.1607	2.23566	down	7.49442e-10	9.34727e-08
23262	PPIP5K2	diphosphoinositol pentakisphosphate kinase 2	4.79782	5.31362	5.58454	6.06538	6.63396	6.4727	2.23254	1.15869	2.23254	up	3.8731e-05	0.000312845
55809	TRERF1	transcriptional regulating factor 1	6.16879	6.05486	6.20733	4.69502	5.12897	5.13288	-2.23154	-1.15804	2.23154	down	4.21369e-07	9.34153e-06
411	ARSB	arylsulfatase B	6.89665	7.06745	7.06745	5.96485	5.8595	5.73366	-2.23124	-1.15785	2.23124	down	1.37899e-08	7.34591e-07
6280	S100A9	S100 calcium binding protein A9	9.02736	8.89964	9.00572	7.83051	7.77896	7.85079	-2.23068	-1.15749	2.23068	down	1.90927e-10	3.60192e-08
137994	LETM2	leucine zipper-EF-hand containing transmembrane protein 2	6.75944	6.70962	6.64142	5.67621	5.48313	5.48007	-2.22997	-1.15702	2.22997	down	9.73305e-09	5.73277e-07
100527950	GJA9-MYCBP	GJA9-MYCBP readthrough	8.44438	8.35602	8.41795	7.18659	7.23353	7.32963	-2.2287	-1.1562	2.2287	down	5.06798e-10	7.15677e-08
26292	MYCBP	MYC binding protein	8.44438	8.35602	8.41795	7.18659	7.23353	7.32963	-2.2287	-1.1562	2.2287	down	5.06798e-10	7.15677e-08
3655	ITGA6	integrin alpha 6	9.49698	9.34483	9.33926	8.19102	8.29796	8.22405	-2.22841	-1.15601	2.22841	down	2.96702e-10	4.89185e-08
205428	C3orf58	chromosome 3 open reading frame 58	6.67115	6.68242	6.61747	5.45971	5.5489	5.49502	-2.22808	-1.1558	2.22808	down	2.6214e-09	2.21689e-07
64129	TINAGL1	tubulointerstitial nephritis antigen-like 1	7.56701	7.30946	7.35559	6.29168	6.18904	6.28548	-2.22729	-1.15529	2.22729	down	9.07515e-09	5.45343e-07
3223	HOXC6	homeobox C6	7.75073	7.82498	8.00693	8.90639	8.9971	9.14183	2.22565	1.15423	2.22565	up	6.44993e-09	4.24144e-07
10988	METAP2	methionyl aminopeptidase 2	7.95988	7.85492	7.867	6.55513	6.9277	6.74118	-2.22314	-1.1526	2.22314	down	2.52629e-08	1.15816e-06
4673	NAP1L1	nucleosome assembly protein 1-like 1	9.26448	9.08428	9.06746	7.99291	8.05782	7.91042	-2.22174	-1.15169	2.22174	down	1.10212e-09	1.21141e-07
3675	ITGA3	integrin alpha 3	10.4191	10.4724	10.4148	9.36313	9.23556	9.2525	-2.22172	-1.15168	2.22172	down	2.9104e-11	1.08766e-08
25874	MPC2	mitochondrial pyruvate carrier 2	6.55053	6.39902	6.57118	5.39895	5.15592	5.5109	-2.22168	-1.15165	2.22168	down	8.44583e-08	2.79812e-06
79018	GID4	GID complex subunit 4 homolog	6.71133	6.72879	6.7557	7.94007	7.77347	7.93664	2.22138	1.15145	2.22138	up	1.38028e-09	1.42532e-07
3556	IL1RAP	interleukin 1 receptor accessory protein	8.05819	7.91987	7.91476	6.72637	6.82566	6.89127	-2.21889	-1.14984	2.21889	down	2.15037e-09	1.96234e-07
54504	CPVL	carboxypeptidase, vitellogenic-like	4.13925	4.49068	4.21623	5.33338	5.62284	5.33591	2.21707	1.14866	2.21707	up	4.33768e-07	9.55703e-06
54557	SGTB	small glutamine-rich tetratricopeptide repeat (TPR)-containing, beta	5.20254	5.03517	5.18665	4.14168	3.98335	3.85352	-2.21699	-1.1486	2.21699	down	8.76305e-08	2.8751e-06
128553	TSHZ2	teashirt zinc finger homeobox 2	5.03101	4.64409	4.76098	5.88591	6.05422	5.94075	2.21647	1.14827	2.21647	up	1.61034e-07	4.51034e-06
2202	EFEMP1	EGF containing fibulin-like extracellular matrix protein 1	8.14184	8.30426	8.30039	7.15638	7.44507	6.70112	-2.21602	-1.14797	2.21602	down	3.84108e-06	5.10237e-05
51714	SELT	selenoprotein T	7.85674	7.93513	7.77232	6.51932	6.83959	6.76333	-2.21502	-1.14732	2.21502	down	2.07281e-08	9.95559e-07
54538	ROBO4	roundabout guidance receptor 4	6.04479	6.15901	6.04767	4.99869	4.98841	4.82523	-2.21358	-1.14638	2.21358	down	1.51835e-08	7.83946e-07
55266	TMEM19	transmembrane protein 19	7.87151	7.79141	7.75041	6.60296	6.6044	6.76696	-2.21351	-1.14634	2.21351	down	2.37611e-09	2.10947e-07
1486	CTBS	chitobiase, di-N-acetyl-	5.47826	5.31045	5.163	4.38067	4.23706	3.89596	-2.213	-1.14601	2.213	down	1.27246e-06	2.19478e-05
25957	PNISR	PNN-interacting serine/arginine-rich protein	4.41174	4.36245	4.45948	5.29966	5.77273	5.59845	2.21257	1.14572	2.21257	up	3.82782e-07	8.69738e-06
1459	CSNK2A2	casein kinase 2, alpha prime polypeptide	5.74955	5.94234	5.65502	6.82434	6.889	7.07071	2.21256	1.14571	2.21256	up	5.16741e-08	1.94037e-06
56953	NT5M	5',3'-nucleotidase, mitochondrial	6.93416	6.88988	6.89037	6.04447	5.55488	5.68229	-2.21032	-1.14426	2.21032	down	2.68208e-07	6.55732e-06
25932	CLIC4	chloride intracellular channel 4	7.7662	7.97788	8.01386	6.49079	6.94277	6.90091	-2.20558	-1.14116	2.20558	down	3.6389e-07	8.3699e-06
55635	DEPDC1	DEP domain containing 1	7.83374	7.57332	7.60415	6.33331	6.72874	6.52774	-2.20453	-1.14047	2.20453	down	1.36601e-07	3.98217e-06
3860	KRT13	keratin 13, type I	8.8701	8.98297	8.81335	7.8274	7.81573	7.60483	-2.20303	-1.13949	2.20303	down	3.25001e-09	2.58727e-07
54463	FAM134B	family with sequence similarity 134 member B	6.21671	6.34053	6.46232	7.38838	7.65125	7.3949	2.20125	1.13832	2.20125	up	3.71099e-08	1.51371e-06
28982	FLVCR1	feline leukemia virus subgroup C cellular receptor 1	5.73253	5.87858	5.77172	4.40725	4.73003	4.83202	-2.20052	-1.13784	2.20052	down	2.95348e-07	7.04954e-06
23032	USP33	ubiquitin specific peptidase 33	6.34568	6.864	6.93625	7.66429	8.03508	7.84535	2.19304	1.13293	2.19304	up	3.49351e-06	4.76156e-05
1678	TIMM8A	translocase of inner mitochondrial membrane 8 homolog A (yeast)	6.06416	6.12363	5.88059	5.11671	4.70718	4.84641	-2.19268	-1.13269	2.19268	down	3.47572e-07	8.05596e-06
114907	FBXO32	F-box protein 32	4.68174	4.74914	4.63121	5.89423	5.71284	5.84958	2.19089	1.13152	2.19089	up	1.94889e-08	9.47638e-07
9099	USP2	ubiquitin specific peptidase 2	4.06759	4.1641	3.74231	4.99837	4.93698	5.43249	2.19053	1.13128	2.19053	up	4.62464e-06	5.91303e-05
7078	TIMP3	TIMP metallopeptidase inhibitor 3	7.74708	7.72507	7.72138	6.6438	6.46957	6.68994	-2.1887	-1.13007	2.1887	down	3.39188e-09	2.65664e-07
113263	GLCCI1	glucocorticoid induced 1	8.55177	8.55437	8.63469	9.65876	9.74652	9.72292	2.18726	1.12912	2.18726	up	6.3394e-11	1.86688e-08
80006	TRAPPC13	trafficking protein particle complex 13	5.58533	5.54225	5.55363	6.65082	6.75393	6.66172	2.18619	1.12842	2.18619	up	3.44542e-09	2.67218e-07
222389	BEND7	BEN domain containing 7	4.36466	4.80644	4.60042	5.66349	5.70342	5.78974	2.18613	1.12838	2.18613	up	3.04028e-07	7.21723e-06
27242	TNFRSF21	tumor necrosis factor receptor superfamily member 21	10.77	10.5219	10.6435	9.51222	9.45513	9.58347	-2.18586	-1.1282	2.18586	down	5.48406e-10	7.55069e-08
8837	CFLAR	CASP8 and FADD like apoptosis regulator	6.86192	6.84846	6.7853	5.83628	5.6875	5.58898	-2.18501	-1.12764	2.18501	down	1.24806e-08	6.85907e-07
23624	CBLC	Cbl proto-oncogene C, E3 ubiquitin protein ligase	5.2275	5.27081	5.23908	4.22326	3.88762	4.24489	-2.18435	-1.12721	2.18435	down	1.97622e-07	5.19525e-06
10444	ZER1	zyg-11 related, cell cycle regulator	6.4568	6.67121	6.52638	7.74569	7.72031	7.5676	2.18314	1.1264	2.18314	up	8.51949e-09	5.20514e-07
64282	PAPD5	PAP associated domain containing 5	6.77642	6.9396	6.97496	7.97423	8.05985	8.03577	2.18297	1.12629	2.18297	up	2.40934e-09	2.12371e-07
94241	TP53INP1	tumor protein p53 inducible nuclear protein 1	4.7696	4.86969	4.79317	5.99429	5.94549	5.87001	2.18219	1.12578	2.18219	up	1.094e-08	6.22153e-07
540	ATP7B	ATPase, Cu++ transporting, beta polypeptide	5.29216	5.18782	5.26735	6.30148	6.49318	6.32896	2.18167	1.12543	2.18167	up	1.42084e-08	7.49381e-07
3840	KPNA4	karyopherin alpha 4 (importin alpha 3)	3.77754	4.1467	4.05798	5.16162	5.32777	4.86854	2.18137	1.12524	2.18137	up	1.88791e-06	2.98115e-05
81706	PPP1R14C	protein phosphatase 1 regulatory inhibitor subunit 14C	5.69128	5.84674	5.74723	4.50029	4.59414	4.81705	-2.1804	-1.12459	2.1804	down	9.69742e-08	3.0912e-06
57708	MIER1	mesoderm induction early response 1, transcriptional regulator	4.3899	4.3899	4.8489	5.65131	5.6097	5.7401	2.17971	1.12414	2.17971	up	8.63055e-07	1.6235e-05
3720	JARID2	jumonji and AT-rich interaction domain containing 2	6.64111	6.648	6.65262	7.74403	7.78641	7.78098	2.17834	1.12323	2.17834	up	5.28387e-10	7.32647e-08
196527	ANO6	anoctamin 6	7.01898	6.99775	6.9294	6.00209	5.95343	5.6217	-2.17795	-1.12297	2.17795	down	1.00107e-07	3.1593e-06
153830	RNF145	ring finger protein 145	7.60737	7.42834	7.56754	8.69294	8.54765	8.72961	2.17696	1.12232	2.17696	up	2.50725e-09	2.16706e-07
10551	AGR2	anterior gradient 2, protein disulphide isomerase family member	6.21003	6.21363	5.98633	7.15974	7.21226	7.40224	2.17561	1.12142	2.17561	up	3.6596e-08	1.50155e-06
1655	DDX5	DEAD (Asp-Glu-Ala-Asp) box helicase 5	5.56293	5.32599	5.58431	4.30142	4.60823	4.21103	-2.16973	-1.11752	2.16973	down	6.18998e-07	1.2632e-05
829	CAPZA1	capping protein (actin filament) muscle Z-line, alpha 1	6.48486	6.30013	6.35533	5.34198	5.32045	5.12801	-2.16839	-1.11663	2.16839	down	3.37411e-08	1.4206e-06
22862	FNDC3A	fibronectin type III domain containing 3A	5.58898	5.61306	5.35492	4.34837	4.4387	4.42633	-2.16523	-1.11452	2.16523	down	6.32348e-08	2.27954e-06
254427	PROSER2	proline and serine rich 2	6.98789	7.13225	7.19906	5.91214	6.04189	6.02376	-2.16415	-1.1138	2.16415	down	1.03045e-08	5.97264e-07
83641	FAM107B	family with sequence similarity 107 member B	6.15064	6.25946	6.09172	4.99912	5.09014	5.07314	-2.16316	-1.11314	2.16316	down	1.31493e-08	7.14649e-07
64795	RMND5A	required for meiotic nuclear division 5 homolog A	6.27861	7.16154	6.97888	5.06477	5.83742	6.17889	-2.16242	-1.11265	2.16242	down	0.00103554	0.00450646
80255	SLC35F5	solute carrier family 35 member F5	6.51571	6.48935	6.55648	5.2219	5.49932	5.50872	-2.15925	-1.11053	2.15925	down	4.65806e-08	1.79727e-06
64778	FNDC3B	fibronectin type III domain containing 3B	9.96041	9.74318	9.8657	8.66844	8.76225	8.80906	-2.15823	-1.10985	2.15823	down	8.13345e-10	9.84668e-08
23731	TMEM245	transmembrane protein 245	6.82045	6.7758	6.712	5.47467	5.75391	5.75646	-2.15507	-1.10774	2.15507	down	4.42888e-08	1.72069e-06
8727	CTNNAL1	catenin alpha-like 1	6.82045	6.7758	6.712	5.47467	5.75391	5.75646	-2.15507	-1.10774	2.15507	down	4.42888e-08	1.72069e-06
151636	DTX3L	deltex 3 like, E3 ubiquitin ligase	9.3278	9.27706	9.33429	8.16329	8.2009	8.2546	-2.15365	-1.10679	2.15365	down	1.03387e-10	2.47373e-08
900	CCNG1	cyclin G1	8.16294	8.1051	8.20507	7.05338	7.14796	6.95919	-2.14979	-1.10419	2.14979	down	2.03886e-09	1.88884e-07
348180	CTU2	cytosolic thiouridylase subunit 2 homolog (S. pombe)	9.00129	8.98854	9.07027	7.90679	7.82993	8.01595	-2.14723	-1.10248	2.14723	down	7.05119e-10	8.93458e-08
5576	PRKAR2A	protein kinase, cAMP-dependent, regulatory subunit type II alpha	9.00129	8.98854	9.07027	7.90679	7.82993	8.01595	-2.14723	-1.10248	2.14723	down	7.05119e-10	8.93458e-08
5106	PCK2	phosphoenolpyruvate carboxykinase 2 (mitochondrial)	7.56426	7.79076	7.54514	6.61913	6.35404	6.61961	-2.14721	-1.10246	2.14721	down	6.57316e-08	2.3427e-06
55680	RUFY2	RUN and FYVE domain containing 2	5.45036	6.01793	6.08721	6.89169	6.94798	7.02251	2.14686	1.10223	2.14686	up	4.14502e-06	5.41987e-05
29890	RBM15B	RNA binding motif protein 15B	8.0775	8.10744	8.10592	9.25249	9.16373	9.18014	2.14627	1.10183	2.14627	up	1.12158e-10	2.58887e-08
1746	DLX2	distal-less homeobox 2	5.14526	4.84628	5.21967	6.24096	6.08219	6.19051	2.14476	1.10082	2.14476	up	2.09285e-07	5.40641e-06
1347	COX7A2	cytochrome c oxidase subunit VIIa polypeptide 2 (liver)	8.51532	8.37679	8.44079	7.35145	7.39021	7.29229	-2.14303	-1.09965	2.14303	down	8.07638e-10	9.84668e-08
388969	C2orf68	chromosome 2 open reading frame 68	5.84678	5.86862	6.02336	4.8096	4.80432	4.82661	-2.14267	-1.09941	2.14267	down	1.86425e-08	9.13439e-07
7056	THBD	thrombomodulin	5.60508	5.8214	5.5541	4.64409	4.28868	4.75185	-2.14155	-1.09865	2.14155	down	1.29568e-06	2.22001e-05
3708	ITPR1	inositol 1,4,5-trisphosphate receptor, type 1	6.38276	5.98665	6.18114	7.14342	7.41976	7.28199	2.14088	1.09821	2.14088	up	2.35073e-07	5.87851e-06
8445	DYRK2	dual specificity tyrosine-(Y)-phosphorylation regulated kinase 2	6.29272	6.40032	6.41723	7.55882	7.34878	7.49559	2.14004	1.09764	2.14004	up	8.04676e-09	4.98036e-07
57827	C6orf47	chromosome 6 open reading frame 47	6.2616	6.16028	6.24261	7.30563	7.30669	7.34376	2.13939	1.0972	2.13939	up	1.98113e-09	1.85094e-07
64965	MRPS9	mitochondrial ribosomal protein S9	7.11755	7.12763	7.17722	5.97694	6.08459	6.07366	-2.13722	-1.09574	2.13722	down	2.96583e-09	2.45009e-07
131566	DCBLD2	discoidin, CUB and LCCL domain containing 2	7.55219	7.31471	7.84571	6.42214	6.67062	6.33899	-2.13409	-1.09362	2.13409	down	1.52429e-06	2.52909e-05
8408	ULK1	unc-51 like autophagy activating kinase 1	6.569	6.71091	6.68667	7.77593	7.66366	7.80575	2.13305	1.09292	2.13305	up	3.56524e-09	2.75394e-07
8555	CDC14B	cell division cycle 14B	6.66494	7.30488	7.13409	8.03575	8.20268	8.14267	2.13228	1.0924	2.13228	up	2.36057e-06	3.51933e-05
51100	SH3GLB1	SH3-domain GRB2-like endophilin B1	7.63257	7.43947	7.4847	6.4173	6.56682	6.29695	-2.13153	-1.09189	2.13153	down	2.68447e-08	1.21358e-06
51317	PHF21A	PHD finger protein 21A	5.19788	5.39292	5.6949	6.33331	6.63529	6.59197	2.13114	1.09162	2.13114	up	1.49962e-06	2.50191e-05
64801	ARV1	ARV1 homolog, fatty acid homeostasis modulator	7.58492	7.50357	7.47425	6.36296	6.42369	6.50463	-2.12946	-1.09049	2.12946	down	3.20977e-09	2.57935e-07
80155	NAA15	N(alpha)-acetyltransferase 15, NatA auxiliary subunit	6.24794	6.03212	6.26554	7.14388	7.38633	7.28617	2.12912	1.09026	2.12912	up	4.33842e-08	1.69435e-06
9331	B4GALT6	UDP-Gal:betaGlcNAc beta 1,4- galactosyltransferase, polypeptide 6	6.93924	6.94798	6.94604	5.93571	5.91905	5.70834	-2.12882	-1.09005	2.12882	down	1.44363e-08	7.57723e-07
7430	EZR	ezrin	10.0493	9.89414	9.96607	8.81614	8.91092	8.91479	-2.12761	-1.08923	2.12761	down	2.07436e-10	3.78725e-08
2887	GRB10	growth factor receptor bound protein 10	7.7941	7.83376	7.80523	8.85899	8.92451	8.9147	2.12634	1.08837	2.12634	up	1.65372e-10	3.4098e-08
58505	OSTC	oligosaccharyltransferase complex subunit (non-catalytic)	10.8756	10.913	10.8926	9.82742	9.83675	9.75408	-2.1253	-1.08767	2.1253	down	9.64086e-12	5.18229e-09
55109	AGGF1	angiogenic factor with G-patch and FHA domains 1	5.01715	4.94876	4.98129	6.02486	5.99036	6.19325	2.12445	1.08709	2.12445	up	2.52417e-08	1.15816e-06
9185	REPS2	RALBP1 associated Eps domain containing 2	5.37314	4.98266	5.64434	6.49572	6.31888	6.44629	2.1242	1.08692	2.1242	up	4.473e-06	5.75477e-05
10434	LYPLA1	lysophospholipase I	7.79377	8.16063	7.88172	6.83082	6.80632	6.94603	-2.12037	-1.08432	2.12037	down	6.4816e-08	2.31849e-06
6515	SLC2A3	solute carrier family 2 (facilitated glucose transporter), member 3	7.67265	7.65712	7.47548	6.44197	6.7115	6.40009	-2.11975	-1.0839	2.11975	down	7.17484e-08	2.48491e-06
144195	SLC2A14	solute carrier family 2 (facilitated glucose transporter), member 14	7.67265	7.65712	7.47548	6.44197	6.7115	6.40009	-2.11975	-1.0839	2.11975	down	7.17484e-08	2.48491e-06
10205	MPZL2	myelin protein zero-like 2	10.2479	10.075	10.1319	9.06436	9.07908	9.06106	-2.11906	-1.08343	2.11906	down	1.3322e-10	2.95342e-08
7626	ZNF75D	zinc finger protein 75D	4.74474	4.36012	4.49637	5.35118	5.79728	5.70199	2.11854	1.08307	2.11854	up	2.58147e-06	3.77269e-05
28227	PPP2R3B	protein phosphatase 2 regulatory subunit B'', beta	4.56178	4.42557	5.1162	5.86505	5.75084	5.72725	2.11384	1.07986	2.11384	up	1.00283e-05	0.000108286
84919	PPP1R15B	protein phosphatase 1 regulatory subunit 15B	6.48865	6.34223	6.23356	7.43174	7.42356	7.4446	2.11182	1.07849	2.11182	up	1.04008e-08	6.01074e-07
5019	OXCT1	3-oxoacid CoA-transferase 1	6.90853	6.97475	6.97033	5.89576	5.97906	5.74492	-2.11104	-1.07796	2.11104	down	1.51657e-08	7.83946e-07
347735	SERINC2	serine incorporator 2	10.7517	10.7433	10.7354	9.69411	9.59662	9.71089	-2.10854	-1.07624	2.10854	down	2.24359e-11	8.80383e-09
57531	HACE1	HECT domain and ankyrin repeat containing E3 ubiquitin protein ligase 1	6.48967	6.40408	6.36864	5.25087	5.323	5.4607	-2.1081	-1.07594	2.1081	down	2.51851e-08	1.15816e-06
8467	SMARCA5	SWI/SNF related, matrix associated, actin dependent regulator of chromatin, subfamily a, member 5	8.39824	8.24809	8.33289	7.06254	7.50143	7.18745	-2.10809	-1.07593	2.10809	down	1.55023e-07	4.38264e-06
4017	LOXL2	lysyl oxidase like 2	8.76293	8.72055	8.64493	7.66375	7.59096	7.64798	-2.10707	-1.07524	2.10707	down	4.94104e-10	7.06203e-08
6695	SPOCK1	sparc/osteonectin, cwcv and kazal-like domains proteoglycan (testican) 1	9.37409	9.11967	9.20491	8.15767	8.09044	8.22614	-2.10644	-1.07481	2.10644	down	3.69418e-09	2.84235e-07
9047	SH2D2A	SH2 domain containing 2A	8.93187	8.72337	8.82043	7.72473	7.6852	7.84191	-2.10615	-1.07461	2.10615	down	3.17419e-09	2.57335e-07
857	CAV1	caveolin 1	11.1684	11.2688	11.2918	10.1425	10.1474	10.2153	-2.10613	-1.0746	2.10613	down	2.36653e-11	9.10416e-09
78990	OTUB2	OTU deubiquitinase, ubiquitin aldehyde binding 2	5.09568	4.77117	5.23733	6.04127	5.99722	6.28558	2.10424	1.0733	2.10424	up	1.52278e-06	2.52873e-05
3146	HMGB1	high mobility group box 1	7.72337	7.69547	7.63716	6.57441	6.73255	6.53028	-2.10369	-1.07292	2.10369	down	5.86073e-09	3.99262e-07
5480	PPIC	peptidylprolyl isomerase C (cyclophilin C)	8.09502	8.09729	8.00115	7.03071	6.8641	7.08383	-2.10177	-1.07161	2.10177	down	5.71122e-09	3.93172e-07
677836	SNORA58	small nucleolar RNA, H/ACA box 58	3.79564	4.11301	4.22031	4.97071	5.1892	5.17889	2.09936	1.06995	2.09936	up	1.11006e-06	1.97635e-05
64764	CREB3L2	cAMP responsive element binding protein 3-like 2	4.06397	4.7177	4.59589	5.36483	5.55868	5.65727	2.09615	1.06774	2.09615	up	1.30188e-05	0.00013342
4976	OPA1	optic atrophy 1 (autosomal dominant)	6.8679	6.64918	6.70951	5.52706	5.74912	5.74912	-2.09521	-1.0671	2.09521	down	6.70372e-08	2.37199e-06
9375	TM9SF2	transmembrane 9 superfamily member 2	8.83686	8.85983	8.83963	7.79637	7.78446	7.75423	-2.0952	-1.06709	2.0952	down	1.7516e-10	3.49035e-08
23366	KIAA0895	KIAA0895	5.45133	5.55869	5.41042	4.31598	4.61042	4.29325	-2.09497	-1.06693	2.09497	down	2.59519e-07	6.37267e-06
11108	PRDM4	PR domain containing 4	5.46964	6.02746	5.99713	6.74744	7.06542	6.88043	2.09413	1.06635	2.09413	up	5.4191e-06	6.69328e-05
5274	SERPINI1	serpin peptidase inhibitor, clade I (neuroserpin), member 1	4.09789	3.95654	3.84327	4.89057	5.28542	4.91806	2.09282	1.06545	2.09282	up	1.23711e-06	2.14703e-05
3192	HNRNPU	heterogeneous nuclear ribonucleoprotein U (scaffold attachment factor A)	6.63793	6.76194	6.71396	5.74955	5.48364	5.68494	-2.09251	-1.06523	2.09251	down	4.33986e-08	1.69435e-06
4090	SMAD5	SMAD family member 5	6.65129	6.69181	6.58571	5.44186	5.81623	5.47519	-2.09243	-1.06518	2.09243	down	2.25083e-07	5.69456e-06
151963	MB21D2	Mab-21 domain containing 2	6.41114	6.44934	6.48563	5.32978	5.35406	5.46842	-2.09161	-1.06462	2.09161	down	1.20147e-08	6.70644e-07
10186	LHFP	lipoma HMGIC fusion partner	6.61442	6.37729	6.50654	5.46715	5.39337	5.44837	-2.08945	-1.06312	2.08945	down	2.73902e-08	1.22553e-06
133308	SLC9B2	solute carrier family 9, subfamily B (NHA2, cation proton antiporter 2), member 2	5.65105	5.92992	5.68708	6.6434	6.80722	7.00646	2.08929	1.06301	2.08929	up	3.74131e-07	8.55531e-06
56898	BDH2	3-hydroxybutyrate dehydrogenase, type 2	5.65105	5.92992	5.68708	6.6434	6.80722	7.00646	2.08929	1.06301	2.08929	up	3.74131e-07	8.55531e-06
81611	ANP32E	acidic nuclear phosphoprotein 32 family member E	10.8838	10.7192	10.8189	9.709	9.75719	9.76698	-2.08911	-1.06289	2.08911	down	7.6962e-11	2.07691e-08
55970	GNG12	guanine nucleotide binding protein (G protein), gamma 12	9.59252	9.50488	9.6299	8.44254	8.59407	8.50267	-2.0888	-1.06267	2.0888	down	4.94362e-10	7.06203e-08
629	CFB	complement factor B	8.48782	8.44462	8.29089	7.43967	7.43182	7.16794	-2.08681	-1.0613	2.08681	down	3.2446e-08	1.38202e-06
55332	DRAM1	DNA damage regulated autophagy modulator 1	7.42179	7.37293	7.39504	6.34829	6.33408	6.32526	-2.08596	-1.06071	2.08596	down	1.7223e-09	1.66871e-07
7136	TNNI2	troponin I type 2 (skeletal, fast)	6.55967	6.54364	6.60468	5.75524	5.50776	5.26383	-2.08549	-1.06039	2.08549	down	5.77752e-07	1.19636e-05
10616	RBCK1	RanBP-type and C3HC4-type zinc finger containing 1	8.92323	8.82516	8.92393	7.86132	7.70763	7.92275	-2.08523	-1.06021	2.08523	down	2.60493e-09	2.2125e-07
3575	IL7R	interleukin 7 receptor	6.2525	6.45388	6.36062	5.20875	5.41158	5.27102	-2.08284	-1.05855	2.08284	down	5.17883e-08	1.9428e-06
9444	QKI	QKI, KH domain containing, RNA binding	4.80766	5.01565	4.79966	5.95912	5.8229	6.01124	2.08026	1.05676	2.08026	up	9.55211e-08	3.06731e-06
23043	TNIK	TRAF2 and NCK interacting kinase	4.24719	4.54225	4.30961	5.09469	5.65336	5.5154	2.07743	1.0548	2.07743	up	5.9066e-06	7.13373e-05
64327	LMBR1	limb development membrane protein 1	6.82449	6.93052	6.99145	5.76747	5.90289	5.9141	-2.07628	-1.054	2.07628	down	1.68635e-08	8.5164e-07
23568	ARL2BP	ADP ribosylation factor like GTPase 2 binding protein	8.20815	8.32928	8.32478	9.30858	9.41458	9.29697	2.07432	1.05264	2.07432	up	5.88438e-10	7.98973e-08
114904	C1QTNF6	C1q and tumor necrosis factor related protein 6	7.43096	7.32913	7.41986	6.3511	6.30013	6.37327	-2.07314	-1.05182	2.07314	down	3.29999e-09	2.61072e-07
10781	ZNF266	zinc finger protein 266	6.8856	6.85487	6.62865	7.72949	8.00489	7.78949	2.0728	1.05158	2.0728	up	8.50307e-08	2.81096e-06
4939	OAS2	2'-5'-oligoadenylate synthetase 2	6.34557	6.36283	6.31503	5.20762	5.25147	5.41115	-2.07206	-1.05106	2.07206	down	2.5869e-08	1.17624e-06
861	RUNX1	runt-related transcription factor 1	7.90569	7.93446	8.0166	6.94038	7.0067	6.75717	-2.07173	-1.05083	2.07173	down	1.22216e-08	6.78268e-07
100506403	LOC100506403	uncharacterized LOC100506403	7.90569	7.93446	8.0166	6.94038	7.0067	6.75717	-2.07173	-1.05083	2.07173	down	1.22216e-08	6.78268e-07
285672	SREK1IP1	SREK1-interacting protein 1	6.76112	6.87187	6.56641	5.5231	5.90843	5.61624	-2.07131	-1.05054	2.07131	down	6.78585e-07	1.35579e-05
9813	EFCAB14	EF-hand calcium binding domain 14	4.71124	5.28413	4.91621	3.66695	4.02056	4.07396	-2.07058	-1.05004	2.07058	down	1.33793e-05	0.000136117
6385	SDC4	syndecan 4	11.896	11.7418	11.8429	10.8206	10.7221	10.7926	-2.06832	-1.04846	2.06832	down	3.97059e-11	1.30929e-08
84168	ANTXR1	anthrax toxin receptor 1	8.16215	8.18328	8.1221	7.02622	7.15184	7.1459	-2.06746	-1.04786	2.06746	down	1.58911e-09	1.5707e-07
4205	MEF2A	myocyte enhancer factor 2A	7.51404	7.40264	7.43751	6.44258	6.52043	6.24832	-2.06712	-1.04762	2.06712	down	2.64915e-08	1.20038e-06
445	ASS1	argininosuccinate synthase 1	11.9465	11.916	11.941	10.888	10.9307	10.8432	-2.0665	-1.04719	2.0665	down	2.7439e-12	2.29087e-09
91947	ARRDC4	arrestin domain containing 4	6.1882	6.05742	6.12439	7.20628	7.1729	7.13066	2.06567	1.04661	2.06567	up	5.41383e-09	3.78679e-07
9962	SLC23A2	solute carrier family 23 (ascorbic acid transporter), member 2	6.97757	6.82858	6.70008	5.82671	5.77399	5.76627	-2.0654	-1.04642	2.0654	down	3.67825e-08	1.50348e-06
6654	SOS1	SOS Ras/Rac guanine nucleotide exchange factor 1	6.89575	6.75984	6.89441	7.74776	7.99304	7.94739	2.06489	1.04606	2.06489	up	1.86925e-08	9.13439e-07
65991	FUNDC2	FUN14 domain containing 2	8.22711	8.22989	8.23303	9.26358	9.33643	9.22461	2.06317	1.04486	2.06317	up	2.09116e-10	3.78725e-08
60313	GPBP1L1	GC-rich promoter binding protein 1-like 1	8.74526	8.68493	8.72111	7.55596	7.68393	7.78007	-2.06162	-1.04378	2.06162	down	2.76768e-09	2.31564e-07
10380	BPNT1	3'(2'), 5'-bisphosphate nucleotidase 1	6.46163	6.46802	6.26669	7.20558	7.39053	7.73126	2.06147	1.04368	2.06147	up	1.32213e-06	2.25469e-05
66036	MTMR9	myotubularin related protein 9	6.52088	6.62209	6.62407	5.37171	5.66981	5.59458	-2.06143	-1.04365	2.06143	down	8.3781e-08	2.7908e-06
28971	AAMDC	adipogenesis associated, Mth938 domain containing	6.62904	6.67534	6.57887	7.73291	7.58346	7.69713	2.0611	1.04342	2.0611	up	4.33072e-09	3.16457e-07
5525	PPP2R5A	protein phosphatase 2 regulatory subunit B', alpha	5.8536	6.28367	6.36881	7.22297	7.2074	7.20546	2.06086	1.04325	2.06086	up	1.03147e-06	1.86263e-05
5770	PTPN1	protein tyrosine phosphatase, non-receptor type 1	9.51941	9.73421	9.76065	8.59679	8.59498	8.69277	-2.06086	-1.04324	2.06086	down	3.23452e-09	2.58727e-07
3434	IFIT1	interferon induced protein with tetratricopeptide repeats 1	9.21302	9.16197	9.10512	7.98368	8.30066	8.0686	-2.05964	-1.04239	2.05964	down	1.47726e-08	7.70847e-07
3920	LAMP2	lysosomal-associated membrane protein 2	4.90985	4.42975	4.31068	3.65465	3.59434	3.27469	-2.05937	-1.0422	2.05937	down	1.92908e-05	0.000181354
91782	CHMP7	charged multivesicular body protein 7	7.66922	7.79204	7.79731	8.79734	8.87501	8.70973	2.0579	1.04117	2.0579	up	2.10118e-09	1.93212e-07
123207	C15orf40	chromosome 15 open reading frame 40	7.60987	7.73449	7.73593	6.72614	6.57725	6.65695	-2.0562	-1.03998	2.0562	down	5.96589e-09	4.0267e-07
34	ACADM	acyl-CoA dehydrogenase, C-4 to C-12 straight chain	5.84608	6.23678	6.04043	6.9222	7.05905	7.26168	2.05606	1.03988	2.05606	up	7.36688e-07	1.44538e-05
6097	RORC	RAR-related orphan receptor C	4.28131	4.44024	4.33506	5.45503	5.37154	5.3457	2.05417	1.03855	2.05417	up	5.35542e-08	1.99856e-06
8644	AKR1C3	aldo-keto reductase family 1, member C3	6.67044	6.74145	6.61839	7.63072	7.84795	7.66704	2.05406	1.03848	2.05406	up	1.2929e-08	7.0542e-07
10413	YAP1	Yes associated protein 1	5.01808	4.48615	4.7872	3.78956	3.91673	3.47266	-2.05266	-1.03749	2.05266	down	1.21254e-05	0.000126574
1845	DUSP3	dual specificity phosphatase 3	5.75208	5.82821	5.80546	6.88202	6.84155	6.76961	2.05026	1.03581	2.05026	up	8.14304e-09	5.0241e-07
5046	PCSK6	proprotein convertase subtilisin/kexin type 6	6.79734	6.95791	6.94604	5.92859	5.87447	5.79452	-2.0485	-1.03457	2.0485	down	1.83305e-08	9.02494e-07
84897	TBRG1	transforming growth factor beta regulator 1	5.50748	5.61553	5.63007	4.53738	4.34782	4.77002	-2.04574	-1.03262	2.04574	down	6.67061e-07	1.33958e-05
3248	HPGD	hydroxyprostaglandin dehydrogenase 15-(NAD)	4.29131	4.85888	4.70659	5.59368	5.6356	5.72171	2.04401	1.0314	2.04401	up	3.79164e-06	5.0567e-05
9655	SOCS5	suppressor of cytokine signaling 5	5.94096	5.83483	5.96988	4.73021	4.97651	4.94524	-2.04378	-1.03124	2.04378	down	1.12542e-07	3.44729e-06
3725	JUN	jun proto-oncogene	5.84598	6.29188	6.15429	7.29998	7.09294	6.99279	2.0437	1.03119	2.0437	up	1.22169e-06	2.12969e-05
3489	IGFBP6	insulin like growth factor binding protein 6	11.4556	11.3759	11.3884	10.4189	10.2601	10.4479	-2.04344	-1.031	2.04344	down	1.76641e-10	3.49035e-08
8411	EEA1	early endosome antigen 1	6.56722	6.30051	6.51972	5.49968	5.51132	5.29083	-2.03996	-1.02854	2.03996	down	1.91022e-07	5.08527e-06
169611	OLFML2A	olfactomedin like 2A	7.61498	7.74475	7.65574	6.79703	6.46845	6.66488	-2.03972	-1.02837	2.03972	down	5.95206e-08	2.17203e-06
54882	ANKHD1	ankyrin repeat and KH domain containing 1	6.28883	6.29734	6.43709	7.3005	7.47757	7.32435	2.03692	1.02639	2.03692	up	1.81119e-08	8.9982e-07
57472	CNOT6	CCR4-NOT transcription complex subunit 6	7.42188	7.34127	7.36801	6.35136	6.42012	6.28098	-2.0367	-1.02623	2.0367	down	5.73426e-09	3.94067e-07
5828	PEX2	peroxisomal biogenesis factor 2	5.6949	5.494	5.6715	6.6449	6.55923	6.7285	2.03366	1.02408	2.03366	up	4.95064e-08	1.87694e-06
1308	COL17A1	collagen, type XVII, alpha 1	9.55633	9.61769	9.54968	8.60558	8.61408	8.43245	-2.03336	-1.02386	2.03336	down	1.07049e-09	1.18327e-07
26783	SNORA65	small nucleolar RNA, H/ACA box 65	4.44438	4.771	4.59576	5.65077	5.56405	5.66683	2.03285	1.0235	2.03285	up	2.33915e-07	5.85758e-06
51540	SCLY	selenocysteine lyase	7.95976	7.94701	8.1035	6.93883	6.93883	7.06244	-2.03269	-1.02339	2.03269	down	6.39656e-09	4.2185e-07
100533179	UBE2F-SCLY	UBE2F-SCLY readthrough (NMD candidate)	7.95976	7.94701	8.1035	6.93883	6.93883	7.06244	-2.03269	-1.02339	2.03269	down	6.39656e-09	4.2185e-07
10397	NDRG1	N-myc downstream regulated 1	5.25455	5.66993	5.44824	4.49205	4.43507	4.37554	-2.03264	-1.02335	2.03264	down	6.77469e-07	1.35494e-05
51200	CPA4	carboxypeptidase A4	7.84239	7.80234	7.83006	6.87711	6.72703	6.80093	-2.03248	-1.02324	2.03248	down	3.15589e-09	2.56392e-07
221294	NT5DC1	5'-nucleotidase domain containing 1	7.06893	7.08193	7.19565	5.89385	6.24473	6.14016	-2.03156	-1.02259	2.03156	down	1.45234e-07	4.15983e-06
6289	SAA2	serum amyloid A2	7.41642	7.41382	7.39289	6.38018	6.31129	6.46648	-2.03035	-1.02173	2.03035	down	5.54708e-09	3.84571e-07
100528017	SAA2-SAA4	SAA2-SAA4 readthrough	7.41642	7.41382	7.39289	6.38018	6.31129	6.46648	-2.03035	-1.02173	2.03035	down	5.54708e-09	3.84571e-07
6288	SAA1	serum amyloid A1	7.41642	7.41382	7.39289	6.38018	6.31129	6.46648	-2.03035	-1.02173	2.03035	down	5.54708e-09	3.84571e-07
5962	RDX	radixin	6.30487	6.90214	6.91622	7.62508	7.78278	7.78042	2.03029	1.02168	2.03029	up	7.80943e-06	8.86696e-05
5329	PLAUR	plasminogen activator, urokinase receptor	7.14105	7.11687	6.97881	6.11368	5.89696	6.16172	-2.02997	-1.02146	2.02997	down	7.14796e-08	2.47998e-06
23658	LSM5	LSM5 homolog, U6 small nuclear RNA and mRNA degradation associated	7.53517	7.36758	7.62858	6.49767	6.48292	6.48666	-2.02983	-1.02136	2.02983	down	1.92077e-08	9.3536e-07
8744	TNFSF9	tumor necrosis factor superfamily member 9	10.0315	9.75409	9.77873	8.83517	8.74677	8.9198	-2.02914	-1.02087	2.02914	down	1.35416e-08	7.28904e-07
89122	TRIM4	tripartite motif containing 4	5.28774	5.50804	5.18358	6.30734	6.35444	6.3779	2.02807	1.02011	2.02807	up	1.39787e-07	4.05114e-06
23060	ZNF609	zinc finger protein 609	3.80976	4.33244	4.06028	5.14845	5.04692	5.0674	2.02805	1.0201	2.02805	up	2.45093e-06	3.62513e-05
5836	PYGL	phosphorylase, glycogen, liver	8.53327	8.48955	8.39813	7.32195	7.61447	7.42865	-2.02599	-1.01863	2.02599	down	2.23129e-08	1.06e-06
10486	CAP2	CAP, adenylate cyclase-associated protein, 2 (yeast)	4.47703	4.60895	4.78919	3.47266	3.69134	3.6595	-2.02402	-1.01722	2.02402	down	6.57682e-07	1.32346e-05
30817	ADGRE2	adhesion G protein-coupled receptor E2	4.88334	4.91972	4.89766	4.13056	3.8144	3.70447	-2.02384	-1.0171	2.02384	down	1.02859e-06	1.85914e-05
8507	ENC1	ectodermal-neural cortex 1 (with BTB domain)	8.61335	8.41487	8.4611	7.42568	7.50176	7.51253	-2.02294	-1.01645	2.02294	down	4.28632e-09	3.13797e-07
4735	SEPT2	septin 2	5.64951	5.70992	5.33054	6.5423	6.72301	6.47342	2.02266	1.01625	2.02266	up	7.55453e-07	1.47146e-05
5825	ABCD3	ATP binding cassette subfamily D member 3	8.22252	8.13551	8.34943	9.21747	9.30066	9.23791	2.02258	1.01619	2.02258	up	2.10248e-09	1.93212e-07
84321	THOC3	THO complex 3	4.10108	3.55538	4.20376	4.94162	4.93584	5.02894	2.02145	1.01539	2.02145	up	1.46221e-05	0.00014559
9945	GFPT2	glutamine-fructose-6-phosphate transaminase 2	7.25294	7.17294	7.19628	6.23835	6.2925	6.0478	-2.02021	-1.0145	2.02021	down	2.95393e-08	1.30092e-06
79101	TAF1D	TATA-box binding protein associated factor, RNA polymerase I, D	6.16833	6.30299	6.21208	7.23835	7.27004	7.21781	2.01988	1.01427	2.01988	up	6.62883e-09	4.32804e-07
677805	SNORA18	small nucleolar RNA, H/ACA box 18	6.16833	6.30299	6.21208	7.23835	7.27004	7.21781	2.01988	1.01427	2.01988	up	6.62883e-09	4.32804e-07
54439	RBM27	RNA binding motif protein 27	4.287	4.71936	4.97597	5.5055	5.8108	5.70821	2.01959	1.01406	2.01959	up	2.18271e-05	0.000199257
54556	ING3	inhibitor of growth family member 3	6.64586	6.50368	6.59741	5.55019	5.67972	5.47564	-2.01922	-1.0138	2.01922	down	4.30819e-08	1.69223e-06
961	CD47	CD47 molecule	8.22948	8.08463	8.20115	7.13337	7.16588	7.17529	-2.01891	-1.01357	2.01891	down	2.36161e-09	2.10822e-07
2707	GJB3	gap junction protein beta 3	7.5353	7.55959	7.52313	6.58837	6.45258	6.53794	-2.01816	-1.01304	2.01816	down	4.37793e-09	3.1872e-07
5594	MAPK1	mitogen-activated protein kinase 1	4.54496	4.44252	4.40646	5.33869	5.60922	5.48007	2.01579	1.01135	2.01579	up	1.90134e-07	5.07542e-06
54577	UGT1A7	UDP glucuronosyltransferase 1 family, polypeptide A7	4.03912	4.04101	3.93703	4.89189	5.10271	5.05598	2.0155	1.01114	2.0155	up	1.43719e-07	4.13642e-06
54659	UGT1A3	UDP glucuronosyltransferase 1 family, polypeptide A3	4.03912	4.04101	3.93703	4.89189	5.10271	5.05598	2.0155	1.01114	2.0155	up	1.43719e-07	4.13642e-06
54578	UGT1A6	UDP glucuronosyltransferase 1 family, polypeptide A6	4.03912	4.04101	3.93703	4.89189	5.10271	5.05598	2.0155	1.01114	2.0155	up	1.43719e-07	4.13642e-06
54657	UGT1A4	UDP glucuronosyltransferase 1 family, polypeptide A4	4.03912	4.04101	3.93703	4.89189	5.10271	5.05598	2.0155	1.01114	2.0155	up	1.43719e-07	4.13642e-06
54576	UGT1A8	UDP glucuronosyltransferase 1 family, polypeptide A8	4.03912	4.04101	3.93703	4.89189	5.10271	5.05598	2.0155	1.01114	2.0155	up	1.43719e-07	4.13642e-06
54600	UGT1A9	UDP glucuronosyltransferase 1 family, polypeptide A9	4.03912	4.04101	3.93703	4.89189	5.10271	5.05598	2.0155	1.01114	2.0155	up	1.43719e-07	4.13642e-06
54658	UGT1A1	UDP glucuronosyltransferase 1 family, polypeptide A1	4.03912	4.04101	3.93703	4.89189	5.10271	5.05598	2.0155	1.01114	2.0155	up	1.43719e-07	4.13642e-06
54575	UGT1A10	UDP glucuronosyltransferase 1 family, polypeptide A10	4.03912	4.04101	3.93703	4.89189	5.10271	5.05598	2.0155	1.01114	2.0155	up	1.43719e-07	4.13642e-06
54579	UGT1A5	UDP glucuronosyltransferase 1 family, polypeptide A5	4.03912	4.04101	3.93703	4.89189	5.10271	5.05598	2.0155	1.01114	2.0155	up	1.43719e-07	4.13642e-06
23177	CEP68	centrosomal protein 68kDa	5.90551	6.0442	5.89497	6.99259	6.94353	6.9413	2.01519	1.01091	2.01519	up	1.29435e-08	7.0542e-07
55902	ACSS2	acyl-CoA synthetase short-chain family member 2	5.93075	6.43408	6.1557	5.14845	5.13671	5.20274	-2.01514	-1.01088	2.01514	down	1.3459e-06	2.28529e-05
5887	RAD23B	RAD23 homolog B, nucleotide excision repair protein	5.13323	6.1238	5.34755	5.94066	7.02133	6.67479	2.01494	1.01073	2.01494	up	0.00255128	0.0095948
79188	TMEM43	transmembrane protein 43	9.76768	9.75974	9.7301	8.73383	8.81961	8.67231	-2.01473	-1.01059	2.01473	down	2.89085e-10	4.80665e-08
4121	MAN1A1	mannosidase, alpha, class 1A, member 1	4.61669	4.50406	4.55091	5.55837	5.56056	5.58204	2.01359	1.00977	2.01359	up	3.51713e-08	1.45805e-06
120227	CYP2R1	cytochrome P450, family 2, subfamily R, polypeptide 1	5.06477	5.3867	5.30103	6.1412	6.38416	6.25575	2.01326	1.00954	2.01326	up	4.08035e-07	9.11805e-06
81539	SLC38A1	solute carrier family 38, member 1	8.20132	7.91996	7.86549	6.82937	7.23344	6.89759	-2.01222	-1.00879	2.01222	down	1.20014e-06	2.0977e-05
205	AK4	adenylate kinase 4	5.02127	5.03906	5.31067	4.31696	3.95587	4.07208	-2.01209	-1.0087	2.01209	down	1.71956e-06	2.77334e-05
3570	IL6R	interleukin 6 receptor	4.98695	5.35985	5.02692	5.91765	6.18491	6.2945	2.01081	1.00778	2.01081	up	2.65147e-06	3.85062e-05
10632	ATP5L	ATP synthase, H+ transporting, mitochondrial Fo complex subunit G	7.92258	7.82084	8.01255	6.8173	6.89983	7.01631	-2.01044	-1.00751	2.01044	down	1.80301e-08	8.98987e-07
56606	SLC2A9	solute carrier family 2 (facilitated glucose transporter), member 9	6.6733	6.78342	6.79248	5.64567	5.7659	5.81555	-2.01023	-1.00736	2.01023	down	2.68765e-08	1.21362e-06
9949	AMMECR1	Alport syndrome, mental retardation, midface hypoplasia and elliptocytosis chromosomal region gene 1	7.59086	7.43156	7.62031	6.54123	6.48865	6.59197	-2.00967	-1.00696	2.00967	down	1.28995e-08	7.04983e-07
9205	ZMYM5	zinc finger, MYM-type 5	6.73521	6.58739	6.65774	7.59858	7.73952	7.66256	2.00941	1.00677	2.00941	up	8.30528e-09	5.10015e-07
2074	ERCC6	excision repair cross-complementation group 6	4.59933	4.50169	4.77999	5.55656	5.67181	5.67181	2.00888	1.00639	2.00888	up	1.93243e-07	5.13049e-06
26227	PHGDH	phosphoglycerate dehydrogenase	10.8021	10.932	10.838	9.94881	9.88818	9.71823	-2.00781	-1.00562	2.00781	down	1.45952e-09	1.47843e-07
538	ATP7A	ATPase, Cu++ transporting, alpha polypeptide	5.5341	5.82803	5.68624	6.4326	6.85426	6.77676	2.00706	1.00508	2.00706	up	1.56104e-06	2.57591e-05
105379283	LOC105379283	uncharacterized LOC105379283	4.37131	4.14847	4.39059	5.39438	5.22572	5.30395	2.00633	1.00456	2.00633	up	2.52964e-07	6.23511e-06
55294	FBXW7	F-box and WD repeat domain containing 7	5.69318	5.82741	5.87039	6.79907	6.78899	6.81631	2.0062	1.00446	2.0062	up	1.84585e-08	9.07656e-07
10097	ACTR2	ARP2 actin-related protein 2 homolog (yeast)	7.58221	8.00512	8.64193	9.01084	9.23542	8.99596	2.006	1.00432	2.006	up	0.000223259	0.00127502
5654	HTRA1	HtrA serine peptidase 1	7.85945	8.09882	7.86194	6.99994	6.9742	6.83544	-2.00492	-1.00354	2.00492	down	4.00184e-08	1.59911e-06
80328	ULBP2	UL16 binding protein 2	5.89412	6.11028	5.99071	5.08943	4.92009	4.97605	-2.00441	-1.00318	2.00441	down	1.05074e-07	3.26757e-06
353091	RAET1G	retinoic acid early transcript 1G	5.89412	6.11028	5.99071	5.08943	4.92009	4.97605	-2.00441	-1.00318	2.00441	down	1.05074e-07	3.26757e-06
154064	RAET1L	retinoic acid early transcript 1L	5.89412	6.11028	5.99071	5.08943	4.92009	4.97605	-2.00441	-1.00318	2.00441	down	1.05074e-07	3.26757e-06
2624	GATA2	GATA binding protein 2	4.15488	4.75305	4.47948	5.62079	5.37262	5.40346	2.00438	1.00315	2.00438	up	9.27778e-06	0.000101807
57146	TMEM159	transmembrane protein 159	5.81345	6.05867	6.15025	6.87876	7.04478	7.10122	2.0011	1.0008	2.0011	up	3.00795e-07	7.15346e-06
53944	CSNK1G1	casein kinase 1, gamma 1	4.13544	4.1631	4.22423	5.09618	5.29555	5.13217	2.00052	1.00038	2.00052	up	1.22151e-07	3.66175e-06
80856	KIAA1715	KIAA1715	5.66568	5.82451	5.98312	4.71657	4.8859	4.8701	-2.00034	-1.00025	2.00034	down	3.44557e-07	8.00464e-06
116039	OSR2	odd-skipped related transciption factor 2	5.00293	5.07896	4.99099	5.96501	6.04321	6.06538	2.00033	1.00024	2.00033	up	2.99225e-08	1.30753e-06
